# Supplementary material for: Eco-Friendly Energy Production: The Influence of Price Factors in the Regions of Russia
Source: Frontiers journal article supplement (doi:10.3389/fenrg.2022.869588), 2022-06-21
Supplement: Data_Sheet_2.xlsx [file Data_Sheet_2.xlsx]

## Sheet: Data_regions
№	Regions	X1	X2	X3	X4	X5	X6	X7	X8	X9	X10	X11	X12	X13	X14	X15	X16	X17	X18	X19	X20	X21	X22	X23	X24	X25	X26	X27	X28	X29	X30	X31
1	Belgorod region	1.10025e+07	1.11232e+07	1.0963e+07	1.10094e+07	3.57417e+06	3.81161e+06	5.1873e+06	5.19491e+06	6.8534	7.41021	6.87913	6.48655	999	1106.7	1111	1051.1	117	175	157	168	14576.7	14934.8	16150.3	16204.3	3.62	3.74	3.92	4	4.16	3	3
2	Bryansk region	1.13428e+06	1.06277e+06	1099958	1.1149e+06	2.76572e+06	2.81483e+06	2697142	2.5869e+06	1.52051	1.83877	2.15954	2.36912	59.3	71.3	82	87.7	47	40	46	47	3900	3877.6	3797.1	3701.8	3.27	3.43	3.66	3.79	3.97	3	3
3	Vladimir region	1.97409e+06	1.99146e+06	1890737	1.81551e+06	5.13641e+06	5.18454e+06	5523863	5.08379e+06	19.6822	26.2723	31.1224	28.7058	1399.5	1885.3	2307.6	1980.5	37	42	54	60	7110.5	7176	7414.6	6899.3	4.05	4.05	4.44	4.48	4.7	3	3
4	Voronezh Region	4.2433e+06	3.7609e+06	4.53906e+06	4.64361e+06	7.0912e+06	7.7998e+06	7.43504e+06	7.47659e+06	160.067	152.119	192.63	236.511	18142.8	17586	23065.7	28665.6	76	104	105	116	11334.5	11560.7	11974.1	12120.2	3.4	3.53	3.74	3.85	4.04	1	5
5	Ivanovo region	870696	851691	832289	811222	2.6509e+06	2.64281e+06	2.63571e+06	2.56848e+06	41.9781	36.938	40.2653	43.3027	1478.3	1290.8	1396.4	1463.5	23	22	17	25	3521.6	3494.5	3468	3379.7	3.89	4.08	4.35	4.5	4.73	3	3
6	Kaluga Region	2.59148e+06	2.76926e+06	2.68043e+06	2.83815e+06	5.56302e+06	5.89314e+06	5.35817e+06	4.85885e+06	3.262	3.13885	3.79171	3.36365	266	271.9	304.8	258.9	27	29	27	26	8154.5	8662.4	8038.6	7697	4.23	4.44	4.68	4.82	5.06	3	3
7	Kostroma region	1.26085e+06	1307744	1.33867e+06	1.16153e+06	2.45335e+06	2398756	2.38963e+06	2.32437e+06	443.431	381.522	431.824	298.201	16469.9	14141.1	16099.7	10395	54	32	44	45	3714.2	3706.5	3728.3	3485.9	4.02	4.18	4.39	4.48	4.66	5	4
8	Kursk region	5.71417e+06	5.52386e+06	5443241	5.54875e+06	3.51103e+06	3.33974e+06	3263459	3.22515e+06	323.527	293.415	288.631	315.87	29846	26007.1	25130.2	27714.1	40	51	58	53	9225.2	8863.6	8706.7	8773.9	3.56	3.68	3.86	3.89	4.03	5	5
9	Lipetsk region	8.12992e+06	8.35504e+06	8.03352e+06	8172498	4.65938e+06	4.65316e+06	4.48108e+06	4462502	40.0342	41.8167	45.1089	44.7519	5120.1	5439.6	5645.2	5654.4	326	316	310	322	12789.3	13008.2	12514.6	12635	3.3	3.43	3.62	3.67	3.85	3	3
10	Moscow region	1.40463e+07	15822283	1.31315e+07	1.42587e+07	3.31136e+07	31525417	3.59581e+07	3.44785e+07	44.8506	43.2203	42.1433	36.9802	21151.5	20463.8	20688	18023.1	227	223	189	203	47159.9	47347.7	49089.6	48737.2	4.81	5.04	5.38	5.56	5.73	1	1
11	Oryol region	836052	820274	796502	778078	1.91105e+06	2.01673e+06	1.971e+06	1.94912e+06	45.6991	46.6796	46.7606	42.1128	1255.4	1324.3	1294.1	1148.5	21	28	26	27	2747.1	2837	2767.5	2727.2	3.5	3.5	3.8	3.84	4	3	3
12	Ryazan region	2.74654e+06	2.69472e+06	2.75502e+06	2.61471e+06	3.76116e+06	4.04098e+06	3.92038e+06	4.00689e+06	83.6978	67.3367	63.394	64.4557	5446.8	4535.6	4231.8	4268	96	83	102	77	6507.7	6735.7	6675.4	6621.6	4.03	4.18	4.45	4.6	4.83	3	3
13	Smolensk region	3.23575e+06	3.09879e+06	2.93139e+06	3.23623e+06	3.14615e+06	3.27871e+06	3.39931e+06	3.21817e+06	393.952	339.679	354.902	381.453	25141.6	21663	22467.8	24620.5	62	57	53	58	6381.9	6377.5	6330.7	6454.4	3.49	3.62	3.84	3.87	4.06	5	5
14	Tambov region	824943	822531	872312	857969	2.77576e+06	2.78367e+06	2.84069e+06	2.68603e+06	30.6718	28.1626	25.637	26.7523	1104.4	1015.6	951.9	948.1	63	56	73	69	3600.7	3606.2	3713	3544	3.51	3.64	3.88	3.96	4.15	3	3
15	Tver region	3.0465e+06	3.12586e+06	2.96279e+06	2.80456e+06	5.868e+06	6.09964e+06	5.03201e+06	4.84404e+06	460.763	467.941	479.064	468.414	41074.7	43169.9	38300.2	35827.1	74	28	67	97	8914.5	9225.5	7994.8	7648.6	3.96	4.03	4.23	4.27	4.27	5	5
16	Tula region	5.49692e+06	5.7222e+06	5.9223e+06	6.03649e+06	4.39898e+06	4.3131e+06	4.3764e+06	4.24631e+06	51.4445	49.9766	51.6085	50.3297	5090.9	5015.3	5315	5175.3	120	109	107	119	9895.9	10035.3	10298.7	10282.8	3.87	4	4.21	4.35	4.57	3	3
17	Yaroslavl region	3.21954e+06	3.19772e+06	3.13885e+06	3.12499e+06	5.70096e+06	5.76458e+06	5.39165e+06	5.12271e+06	66.8483	77.9086	78.8781	85.71	5963.2	6982.4	6728.7	7069.1	76	73	92	84	8920.5	8962.3	8530.5	8247.7	3.3	3.43	3.62	3.69	3.84	3	3
18	Moscow	7.88843e+06	9425381	8.78167e+06	8.56428e+06	4.8747e+07	47273419	4.78605e+07	4.41419e+07	86.4692	89.8082	91.8806	91.5147	48972.2	50920.2	52043.2	48233.9	60	61	75	60	56635.4	56698.8	56642.2	52706.2	5.38	5.38	5.47	5.47	5.66	1	1
19	Republic of Karelia	4.45166e+06	4.43847e+06	4.40587e+06	4.62894e+06	3.47454e+06	3.49343e+06	3.40803e+06	3.02626e+06	66.7508	63.3631	63.3794	71.5331	5290.8	5025.9	4952.4	5476	114	124	122	129	7926.2	7931.9	7813.9	7655.2	3.15	3.26	3.44	3.52	3.68	3	3
20	Republic of Komi	5.71668e+06	5.82363e+06	5.84001e+06	5.50682e+06	3.36622e+06	3.34257e+06	3.37569e+06	3.10368e+06	111.202	115.238	114.782	115.908	10100.4	10562.9	10578	9980.3	451	488	392	350	9082.9	9166.2	9215.7	8610.5	4.26	4.43	4.67	4.72	4.9	3	3
23	Nenets Autonomous Okrug (NAO)	2.12003e+06	2.07039e+06	2.10065e+06	1.82217e+06	161974	152813	153854	139833	82.1385	81.2478	294.407	340.005	1874.4	1806.3	6637.4	6670.9	100	73	67	59	2282	2223.2	2254.5	1962	4.62	4.85	5.18	5.3	5.42	3	4
24	Arkhangelsk region without NAO	4.0667e+06	4.11978e+06	4.01933e+06	4.18788e+06	3.7022e+06	3.70162e+06	3.86387e+06	3.72892e+06	84.7894	84.7508	23.4828	20.747	6587.2	6628.7	1851.2	1642.5	151	131	137	131	7768.9	7821.4	7883.2	7916.8	4.41	4.59	4.85	4.91	5.1	3	3
25	Vologda region	8.83382e+06	9.11101e+06	9.18862e+06	9.25817e+06	6.12488e+06	5.69559e+06	5.45398e+06	5.44713e+06	65.993	70.1025	72.0132	71.2029	9871.7	10379.8	10544.6	10470.6	429	376	413	377	14958.7	14806.6	14642.6	14705.3	4.05	4.25	4.51	4.67	4.87	3	3
26	Kaliningrad region	963484	1002502	1.07022e+06	1.04353e+06	3.47352e+06	3438098	3.39698e+06	3.34447e+06	160.476	166.45	159.626	145.773	7120.3	7391.4	7130.8	6396.5	26	24	23	21	4437	4440.6	4467.2	4388	3.79	3.92	4.12	4.2	4.36	3	3
27	Leningrad region	8.80195e+06	9.63932e+06	1.00049e+07	9.89876e+06	1.10308e+07	1.10211e+07	1.12287e+07	1.09461e+07	192.021	206.448	206.207	192.238	38083	42653	43785.2	40071.9	226	218	194	214	19832.7	20660.4	21233.6	20844.9	3.7	3.88	4.14	4.27	4.48	1	5
28	Murmansk region	8.8975e+06	8.92154e+06	9.00746e+06	8.90781e+06	3.8996e+06	3.63076e+06	3.72014e+06	3.48609e+06	136.389	137.854	131.046	133.157	17453.9	17303.9	16679	16503.4	243	215	231	199	12797.1	12552.3	12727.6	12393.9	2.62	2.65	2.725	2.76	2.82	1	3
29	Novgorod region	1611065	1750999	1854433	1.96136e+06	2855735	2631201	2608267	2.56704e+06	45.6971	42.3668	37.6073	44.6935	2041.2	1856.6	1678.3	2023.9	53	56	61	63	4466.8	4382.2	4462.7	4528.4	3.97	4.1	4.31	4.35	4.52	3	3
30	Pskov region	504776	460165	448892	446071	1.62722e+06	1.66734e+06	1.66501e+06	1.61773e+06	38.5553	8.87897	10.8141	9.24508	822	188.9	228.6	190.8	35	37	40	37	2132	2127.5	2113.9	2063.8	3.98	4.12	4.32	4.4	4.6	3	3
31	Saint Petersburg	5.02987e+06	5483098	5.34268e+06	5.02676e+06	2.31746e+07	22983002	2.16241e+07	2.0191e+07	76.4296	81.779	83.8828	79.8646	21556.6	23279.3	22620.5	20140.1	87	84	67	67	28204.5	28466.1	26966.8	25217.8	4.12	4.32	4.61	4.75	4.82	1	1
32	Republic of Adygea	279476	266153	268619	275381	1.15512e+06	1.17995e+06	1.16598e+06	1.37362e+06	11.4736	11.3408	11.2226	22.5349	164.6	164	161	371.6	10	8	6	8	1434.6	1446.1	1434.6	1649	4.28	4.44	4.69	4.81	5.02	3	3
33	Republic of Kalmykia	30111	28802.3	44208.2	33251.9	474289	508598	528992	698648	9.77399	21.6785	21.1619	30.9469	49.3	116.5	121.3	226.5	3	4	6	3	504.4	537.4	573.2	731.9	4.17	4.38	4.67	4.83	5.07	3	3
34	Republic of Crimea	883073	929349	1.001e+06	1.06454e+06	4.97803e+06	5.17745e+06	5.2816e+06	5.28986e+06	31.8848	36.2285	58.9597	60.1977	1868.8	2212.4	3704.2	3825.2	29	23	31	37	5861.1	6106.8	6282.6	6354.4	2.04	2.43	2.74	3.04	3.31	3	3
35	Krasnodarskiy Territory	5.05734e+06	5.07769e+06	5.48773e+06	5.5327e+06	1.81757e+07	1.88302e+07	1.92845e+07	1.95755e+07	51.3304	52.0773	43.1661	43.1154	11925.6	12450.6	10693.2	10825.5	427	825	432	415	23233	23907.9	24772.2	25108.2	4.28	4.28	4.69	4.81	5.02	1	1
36	Astrakhan region	1.59226e+06	1.59946e+06	1.64592e+06	1586463	2.72454e+06	2.68814e+06	2.72428e+06	2725337	98.6634	98.3651	98.4669	101.062	4259.1	4217.5	4303.2	4357.6	103	33	104	112	4316.8	4287.6	4370.2	4311.8	4.34	4.53	4.8	4.84	5.01	3	3
37	Volgograd region	7.31731e+06	8.10611e+06	7787534	8.32885e+06	5.95229e+06	7.47379e+06	8451366	8.09435e+06	138.526	115.202	104.038	112.837	18381.8	17948.3	16894.6	18531.5	138	145	144	175	13269.6	15579.9	16238.9	16423.2	3.86	4.02	4.22	4.32	4.51	1	3
38	Rostov region	6.45743e+06	6.90275e+06	6.91738e+06	6.8509e+06	1.23055e+07	1.27131e+07	1.24067e+07	1.21391e+07	197.81	215.852	230.605	226.609	37114.9	42341	44562.4	43033.1	195	57	158	175	18762.9	19615.8	19324.1	18990	3.6	3.6	3.89	3.96	4.11	1	5
39	Sevastopol	99021.8	145910	144186	144511	1.25908e+06	1.95479e+06	2.23441e+06	2.11519e+06	28.2895	39.3869	121.542	118.609	384.2	827.4	2891	2680.2	5	3	3	7	1358.1	2100.7	2378.6	2259.7	2.42	2.94	3.16	3.41	3.61	3	3
40	Republic of Dagestan	292800	247486	278294	285425	6.1004e+06	6130114	6248606	6.48537e+06	66.2704	75.0251	63.0866	55.6197	4236.8	4784.8	4117.6	3765.9	14	14	13	10	6393.2	6377.6	6526.9	6770.8	2.34	2.41	2.52	2.58	2.7	3	3
41	Republic of Ingushetia	34015.3	102674	61632.3	69953.2	700085	662726	745668	759647	0	0	0	0	0	0	0	0	1	1	8	2	734.1	765.4	807.3	829.6	3.25	3.36	3.53	3.56	3.73	3	3
42	Kabardino-Balkarian Republic	283900	256606	260252	269082	1.341e+06	1.35749e+06	1369148	1.40032e+06	32.0512	29.8123	25.7334	32.2571	520.8	481.2	419.3	538.5	3	3	3	3	1624.9	1614.1	1629.4	1669.4	3.47	3.58	3.75	3.78	3.96	3	3
43	Karachay-Cherkess Republic	517183	489028	493754	462100	831417	909472	870746	847100	90.5235	93.6789	87.9516	81.9279	1220.8	1310.1	1200.1	1072.6	17	15	15	16	1348.6	1398.5	1364.5	1309.2	3.7	3.82	4.01	4.05	4.24	3	3
44	Republic of North Ossetia - Alania	611631	534771	226125	210352	846869	931629	1275175	1.28995e+06	20.4182	22.1631	19.7096	50.8432	297.8	325	295.9	762.8	4	11	7	10	1458.5	1466.4	1501.3	1500.3	3.77	3.85	4.02	4.06	4.25	3	3
45	Chechen Republic	255694	249208	272835	271150	2428606	2.50589e+06	2648865	2.63285e+06	0.361361	0.319408	24.1229	45.3065	9.7	8.8	704.8	1315.7	15	14	16	16	2684.3	2755.1	2921.7	2904	2.46	2.54	2.62	2.68	2.81	3	3
46	Stavropol Territory	3.77986e+06	3.74397e+06	3.47929e+06	3.42972e+06	6.64994e+06	6.85033e+06	6.87561e+06	6.80418e+06	196.952	172.093	135.071	123.289	20541.7	18232	13986.5	12617.3	95	95	102	110	10429.8	10594.3	10354.9	10233.9	4.16	4.33	4.55	4.48	4.86	1	3
47	Republic of Bashkortostan	1.4919e+07	14993800	1.49093e+07	1.35693e+07	1.30034e+07	12685000	1.28724e+07	1.17109e+07	85.4543	88.5443	95.8527	97.7413	23860.9	24508	26629.5	24709.2	418	455	471	441	27922.4	27678.8	27781.7	25280.2	2.74	2.87	3.06	3.17	3.33	1	1
48	Republic of Mari El	651690	671528	677018	675762	2.11411e+06	2.03477e+06	2.06068e+06	2.23154e+06	34.4313	35.41	33.6962	31.9678	952.3	958.3	922.5	929.4	35	38	37	55	2765.8	2706.3	2737.7	2907.3	3.38	3.49	3.72	3.75	3.89	3	3
49	Republic of Mordovia	1.2661e+06	1.31012e+06	1.29217e+06	1.2495e+06	2.1836e+06	2.17208e+06	2.21683e+06	2.0231e+06	43.4096	48.768	48.2873	45.6671	1497.5	1698.2	1694.4	1494.5	54	38	51	59	3449.7	3482.2	3509	3272.6	3.25	3.38	3.56	3.64	3.79	3	3
50	Republic of Tatarstan	1.76369e+07	1.85537e+07	1.87793e+07	1.74678e+07	1.18381e+07	1.23694e+07	1.21732e+07	1.14604e+07	75.2197	89.6631	94.4735	83.0587	22171	27726.6	29241.9	24027.4	286	394	290	325	29475	30923.1	30952.5	28928.2	3.43	3.56	3.75	3.78	3.93	1	1
51	Udmurt Republic	4.74078e+06	4.68671e+06	4.61872e+06	4.27038e+06	5.00302e+06	5.11319e+06	4.51718e+06	4.20422e+06	35.4862	39.7616	41.4311	42.4185	3457.7	3896.6	3785.1	3594.8	139	179	197	131	9743.8	9799.9	9135.9	8474.6	3.44	3.57	3.75	3.82	3.97	3	3
52	Chuvash Republic	1.6673e+06	1.65604e+06	1.7042e+06	1615389	3.4231e+06	3.44376e+06	3.4109e+06	3230511	102.947	89.4035	80.9056	93.4295	5240.4	4559.4	4138.4	4527.5	43	42	37	25	5090.4	5099.8	5115.1	4845.9	2.98	3.11	3.3	3.36	3.48	3	3
53	Perm Territory	1.37902e+07	1.4189e+07	1.4067e+07	1.33219e+07	1.28446e+07	1.2499e+07	1.21402e+07	1.10745e+07	117.683	122.41	119.286	110.621	31344.6	32668.7	31261.6	26987.6	311	293	293	281	26634.8	26688	26207.2	24396.4	3.62	3.77	3.99	4.13	4.25	1	1
54	Kirov region	2835118	2.87046e+06	2.89839e+06	2.84206e+06	4518082	4.59714e+06	4.50731e+06	4.37174e+06	60.7518	58.7083	58.96	57.8516	4467.2	4384.1	4366.4	4173.3	98	94	89	87	7353.2	7467.6	7405.7	7213.8	3.51	3.65	3.85	3.95	4.1	3	3
55	Nizhny Novgorod region	8645535	8.61101e+06	8.72412e+06	8.53616e+06	14209665	1.40836e+07	1.40522e+07	1.22958e+07	45.4181	44.4943	43.2792	53.3842	10380.4	10097.8	9857.4	11121	151	92	162	122	22855.2	22694.6	22776.3	20832	3.32	3.32	3.64	3.71	3.84	1	3
56	Orenburg region	1.00263e+07	1.02746e+07	9.14915e+06	9.75886e+06	5.83129e+06	6.22435e+06	7.26465e+06	7.65704e+06	74.7156	71.0781	65.8361	65.2392	11848.1	11727.1	10806.2	11362	475	508	452	405	15857.6	16498.9	16413.8	17415.9	2.68	2.81	2.99	3.08	3.19	3	3
57	Penza region	1.13854e+06	1.08656e+06	1.15353e+06	1.13793e+06	3.64986e+06	3.77214e+06	3.65537e+06	3.50477e+06	26.395	27.104	25.6046	26.5535	1263.9	1316.9	1231.3	1232.8	37	27	28	33	4788.4	4858.7	4808.9	4642.7	3.13	3.27	3.44	3.51	3.63	3	3
58	Samara region	1.16442e+07	1.17681e+07	1.17159e+07	1.10614e+07	1.37491e+07	1.48623e+07	1.3951e+07	1.3828e+07	87.4743	91.2198	86.4226	95.6234	22212.6	24292.2	22182	23800.1	251	218	254	255	25393.3	26630.4	25666.9	24889.4	3.67	3.84	4.06	4.17	4.32	1	1
59	Saratov region	5.37052e+06	5.4346e+06	5.35291e+06	5.29837e+06	8.62478e+06	8.3781e+06	7.66269e+06	7.22183e+06	303.407	304.779	303.194	327.372	42462.7	42098.2	39462.5	40987.6	123	118	120	127	13995.3	13812.7	13015.6	12520.2	3.19	3.31	3.48	3.55	3.68	5	5
60	Ulyanovsk region	1.86328e+06	1827627	1.77869e+06	1.85584e+06	3.83332e+06	3816973	3.80311e+06	3.46806e+06	45.9414	49.1532	48.1744	44.6627	2617.1	2774.5	2689	2377.8	34	31	28	31	5696.6	5644.6	5581.8	5323.9	3.42	3.55	3.74	3.77	3.9	3	3
61	Kurgan region	936338	916895	946003	930557	3.42316e+06	3.4756e+06	3.1998e+06	2.94434e+06	75.2059	73.4388	77.2661	66.1488	3278.6	3225.8	3203.3	2563.2	44	39	45	39	4359.5	4392.5	4145.8	3874.9	3.82	3.21	3.32	3.32	3.32	3	3
62	Sverdlovsk region	2.49207e+07	2.49561e+07	2.41273e+07	2.39264e+07	2.31166e+07	2.33481e+07	2.46862e+07	2.4723e+07	113.908	113.779	115.77	116.889	54718.3	54959.8	56511.3	56866	928	857	898	784	48037.3	48304.2	48813.5	48649.4	3.54	3.71	3.96	4.08	4.28	2	2
65	Khanty-Mansi Autonomous Okrug (KMAO)	6.46894e+07	6.52478e+07	6.54847e+07	6.19627e+07	9.56787e+06	9.55604e+06	9.58716e+06	9.57154e+06	119.456	116.44	16.9483	17.3587	88704.7	87101.2	12723.4	12417.4	1412	1377	1270	1142	74257.3	74803.8	75071.9	71534.2	2.58	2.68	2.82	2.87	2.97	2	2
66	Yamalo-Nenets Autonomous Okrug (YNAO)	9492570	9.81021e+06	1.00362e+07	1.00787e+07	2492930	2.46779e+06	2.43526e+06	2.71037e+06	69.6675	77.4222	693.054	605.032	8350	9505.9	86434.2	77378.2	786	742	763	878	11985.5	12278	12471.5	12789.1	2.58	2.44	2.82	2.87	2.97	3	5
67	Tyumen region without KMAO and YNAO	4.10364e+06	4.513e+06	5.39589e+06	6.76487e+06	6.68486e+06	6.5683e+06	6.82281e+06	7.31283e+06	103.264	109.927	93.8733	80.7653	11140.6	12181.3	11470.1	11369.9	138	190	186	163	10788.5	11081.3	12218.7	14077.7	2.58	2.68	2.82	2.87	2.97	3	3
68	Chelyabinsk region	2.37928e+07	2.43777e+07	2.48356e+07	2.44582e+07	1.22317e+07	1.33535e+07	1.29296e+07	1.29831e+07	79.2494	81.0104	79.9109	71.1052	28549.2	30566.2	30178.5	26622.7	533	488	493	457	36024.5	37731.2	37765.2	37441.3	2.92	3.03	3.19	3.25	3.36	1	1
69	Republic of Altai	41890.2	40040.6	42843.8	45883.5	514710	558759	559756	642716	4.74308	8.96794	10.8198	22.0157	26.4	53.7	65.2	151.6	7	4	6	7	556.6	598.8	602.6	688.6	4.63	4.81	5.06	5.23	5.36	3	3
70	Republic of Tyva	147292	173854	177113	145814	672908	645346	648087	678486	13.1675	13.4521	14.3602	12.7987	108	110.2	118.5	105.5	20	4	5	5	820.2	819.2	825.2	824.3	3.15	3.3	3.52	3.64	3.82	3	3
71	Republic of Khakassia	1.406e+07	14064658	1.40913e+07	1.41202e+07	3.4186e+06	2.54924e+06	2.03153e+06	2.34828e+06	147.856	179.3	171.667	182.698	25843.2	29788.7	27677.5	30087.7	115	107	105	110	17478.6	16613.9	16122.8	16468.5	1.92	1.99	2.11	2.17	2.27	1	5
72	Altai Territory	3029334	2.92992e+06	2.9159e+06	2.806e+06	7651966	7.79198e+06	7.6038e+06	7.4983e+06	68.9401	64.385	59.1452	54.7897	7363.7	6903.3	6221.9	5645.7	204	192	169	175	10681.3	10721.9	10519.7	10304.3	3.7	3.81	3.99	4.09	4.29	3	3
73	Krasnoyarsk Territory	3.74878e+07	3.75325e+07	3.93408e+07	3.95936e+07	1.53424e+07	1.58795e+07	1.4833e+07	1.51406e+07	127.356	125.228	125.08	121.193	67282.3	66886.8	67760.7	66334.2	2371	2319	2432	2540	52830.2	53412	54173.8	54734.2	2.26	2.26	2.52	2.58	2.71	2	2
74	Irkutsk region	3.42774e+07	29336514	3.15196e+07	2.9533e+07	1.96519e+07	26328186	2.50265e+07	2.56139e+07	90.5157	93.7526	104.205	111.008	48814.5	52187.1	58923.7	61217.7	660	641	644	655	53929.3	55664.7	56546.1	55146.9	0.97	1.01	1.078	1.11	1.17	2	2
75	Kemerovo region	2.22088e+07	2.25319e+07	2.23234e+07	2.22211e+07	1.34616e+07	1.30808e+07	1.29895e+07	1.19444e+07	69.2639	63.7174	62.8694	60.1929	24706.7	22691.5	22201	20565.2	1488	1384	1760	1612	35670.4	35612.7	35312.9	34165.5	3.04	3.15	3.33	3.43	3.59	2	2
76	Novosibirsk region	3.93641e+06	4.06348e+06	3.86153e+06	3.75358e+06	1.2201e+07	1.25822e+07	1.26353e+07	1.23027e+07	86.4197	78.7741	80.7066	77.5677	13945.9	13112.5	13314	12454.5	195	126	136	164	16137.4	16645.7	16496.8	16056.3	2.42	2.49	2.6	2.68	2.8	1	3
77	Omsk region	4.3974e+06	4.38421e+06	4215996	4.24653e+06	6.4095e+06	6.70709e+06	6584604	6.10457e+06	65.7608	60.9045	57.9449	57.3282	7106.7	6755.1	6258.4	5934.1	193	202	151	147	10806.9	11091.3	10800.6	10351.1	3.56	3.68	3.92	4.06	4.26	3	3
78	Tomsk region	4.47266e+06	4.26279e+06	4.66635e+06	4.16334e+06	3.97504e+06	4.59931e+06	4.17155e+06	4.05746e+06	44.6915	44.3563	40.9351	42.2538	3775.4	3930.9	3617.8	3473.6	263	238	225	177	8447.7	8862.1	8837.9	8220.8	3.1	3.25	3.42	3.5	3.66	3	3
79	Republic of Buryatia	1.42322e+06	1.45619e+06	1.40266e+06	1.30821e+06	4.84828e+06	4.43221e+06	3.89864e+06	3.74899e+06	100.04	100.012	99.3247	95.63	6274	5889.1	5265.5	4836.2	113	93	69	94	6271.5	5888.4	5301.3	5057.2	4.098	3.931	3.998	4.04	4.21	3	3
80	Republic of Sakha (Yakutia)	3.96404e+06	4196973	4.35429e+06	4.3291e+06	4.16526e+06	4780727	5.37631e+06	5.1025e+06	113.488	108.348	103.878	107.166	9225.8	9727.2	10108	10107.5	244	256	288	286	8129.3	8977.7	9730.6	9431.6	5.47	5.68	5.99	6.19	6.5	4	4
81	Zabaikal Territory	1.92799e+06	1.94344e+06	2216658	2.24116e+06	5.99041e+06	6.01706e+06	6.00864e+06	5.95134e+06	90.3339	90.9453	90.6168	89.4965	7153	7239.7	7453.5	7332	134	104	111	137	7918.4	7960.5	8225.3	8192.5	2.76	2.76	3.04	3.08	3.22	3	3
82	Kamchatka Territory	465086	420841	431729	445183	1.34561e+06	1440259	1.48657e+06	1.52492e+06	100	100	100	100	1810.7	1861.1	1918.3	1970.1	38	41	38	39	1810.7	1861.1	1918.3	1970.1	8.174	6.686	6.686	6.8	6.686	4	4
83	Primorsky Territory	2.996e+06	3.01709e+06	3.40566e+06	3268726	1.01864e+07	1.03947e+07	9.96814e+06	10150574	81.0194	81.5834	84.8786	80.8544	10680.3	10941.8	11351.5	10850.1	186	181	178	170	13182.4	13411.8	13373.8	13419.3	3.37	3.54	3.74	3.8	3.97	3	3
84	Khabarovsk Territory	2.79632e+06	3.22012e+06	3.33465e+06	3.22791e+06	5.90138e+06	6.11908e+06	6.05785e+06	5.72529e+06	104.247	102.25	95.8563	99.9106	9067.1	9549.3	9003.3	8945.2	118	84	112	121	8697.7	9339.2	9392.5	8953.2	4.11	4.27	4.51	4.43	4.73	3	3
85	Amur region	1.8209e+06	1811723	1.59418e+06	1694216	6.4661e+06	6910377	7.14572e+06	7027984	172.445	158.664	173.442	188.113	14290.5	13838.8	15158.7	16407.6	133	113	124	136	8287	8722.1	8739.9	8722.2	3.4	3.52	3.7	3.64	3.91	1	3
86	Magadan region	1.31678e+06	1.60442e+06	1.74674e+06	1.77314e+06	927222	940284	1.00036e+06	1.01986e+06	108.084	107.639	108.005	108.278	2425.4	2739.1	2967	3024.2	33	29	60	40	2244	2544.7	2747.1	2793	6.93	7.2	7.54	7.62	7.46	4	4
87	Sakhalin region	2.1569e+06	2.22889e+06	2.2729e+06	2.33429e+06	2.2497e+06	2.28751e+06	2.3795e+06	2.47981e+06	100	100	100	100	4406.6	4516.4	4652.4	4814.1	105	85	57	64	4406.6	4516.4	4652.4	4814.1	3.83	3.96	4.15	4.24	4.4	3	3
88	Jewish Autonomous region	355190	390783	386031	391600	885110	941017	903769	1.052e+06	0.00806257	0.00750863	0.0155063	0.0138543	0.1	0.1	0.2	0.2	23	19	16	17	1240.3	1331.8	1289.8	1443.6	3.62	3.76	3.91	4	4.05	3	3
89	Chukotka Autonomous Okrug (CAO)	459791	479141	500818	528001	231109	239959	248182	251499	101.983	101.877	101.736	101.758	704.6	732.6	762	793.2	20	23	18	17	690.9	719.1	749	779.5	7.9	8.2	8.34	8.42	8.5	4	4

## Sheet: Data_regions_norm
№	Regions	X1	X2	X3	X4	X5	X6	X7	X8	X9	X10	X11	X12	X13	X14	X15	X16	X17	X18	X19	X20	X21	X22	X23	X24	X25	X26	X27	X28	X29
1	Belgorod region	0.170082	0.170476	0.167413	0.177678	0.0733208	0.080629	0.108384	0.117687	0.014874	0.0158358	0.00992582	0.010721	0.0112621	0.0127059	0.0128537	0.0135839	0.0493463	0.0754636	0.0645559	0.0661417	0.1963	0.199653	0.215131	0.226525	0.442868	0.456098	0.470024	0.475059	0.489412
2	Bryansk region	0.0175343	0.0162883	0.0167972	0.0179932	0.0567362	0.0595436	0.0563542	0.0586041	0.00329999	0.00392948	0.00311598	0.00391569	0.00066851	0.000818588	0.000948699	0.00113339	0.0198229	0.0172488	0.0189145	0.0185039	0.0525201	0.0518369	0.0505795	0.0517487	0.400049	0.418293	0.438849	0.450119	0.467059
3	Vladimir region	0.0305164	0.0305215	0.0288729	0.0293001	0.105369	0.109671	0.115416	0.115169	0.0427165	0.0561445	0.0449062	0.0474451	0.0157771	0.0216449	0.0266978	0.0255951	0.0156052	0.0181113	0.0222039	0.023622	0.0957549	0.095931	0.0987666	0.0964476	0.495473	0.493902	0.532374	0.532067	0.552941
4	Voronezh Region	0.065595	0.0576403	0.0693147	0.0749421	0.145469	0.164993	0.155348	0.169376	0.347396	0.325081	0.277944	0.390906	0.20453	0.201903	0.266858	0.370461	0.032054	0.0448469	0.0431743	0.0456693	0.152638	0.154547	0.159502	0.169432	0.415953	0.430488	0.448441	0.457245	0.475294
5	Ivanovo region	0.0134596	0.0130532	0.0127097	0.0130921	0.0543809	0.0559048	0.0550707	0.0581868	0.0911056	0.0789374	0.0580984	0.0715708	0.0166654	0.0148195	0.0161556	0.0189136	0.00970055	0.00948685	0.00699013	0.00984252	0.0474243	0.0467155	0.0461957	0.0472459	0.475899	0.497561	0.521583	0.534442	0.556471
6	Kaluga Region	0.0400604	0.0424423	0.0409321	0.0458042	0.11412	0.124661	0.111954	0.110073	0.00707957	0.0067078	0.00547101	0.00555945	0.00299871	0.00312166	0.00352638	0.0033459	0.0113876	0.0125054	0.011102	0.0102362	0.109814	0.115802	0.107079	0.107599	0.517494	0.541463	0.561151	0.572447	0.595294
7	Kostroma region	0.0194909	0.0200427	0.0204425	0.0187456	0.0503282	0.0507422	0.049929	0.0526569	0.962384	0.81532	0.623075	0.492868	0.185671	0.162353	0.186265	0.13434	0.0227752	0.0137991	0.0180921	0.0177165	0.050018	0.0495496	0.0496631	0.0487305	0.491803	0.509756	0.526379	0.532067	0.548235
8	Kursk region	0.0883324	0.0846598	0.0831223	0.08955	0.0720256	0.0706473	0.0681869	0.0730631	0.702155	0.627033	0.416462	0.522071	0.336465	0.298585	0.290744	0.358164	0.0168705	0.0219922	0.0238487	0.0208661	0.124233	0.118491	0.115978	0.122653	0.435527	0.44878	0.46283	0.461995	0.474118
9	Lipetsk region	0.125676	0.128051	0.122678	0.131894	0.095583	0.0984308	0.0936279	0.101094	0.0868869	0.0893632	0.0650872	0.0739661	0.0577207	0.0624515	0.0653121	0.0730748	0.137495	0.136266	0.127467	0.126772	0.17223	0.173898	0.166702	0.176629	0.403719	0.418293	0.434053	0.435867	0.452941
10	Moscow region	0.217134	0.242495	0.200527	0.230118	0.679296	0.666874	0.751311	0.781082	0.0973399	0.0923626	0.0608082	0.061121	0.238448	0.234943	0.23935	0.232922	0.0957402	0.0961621	0.0777138	0.0799213	0.635088	0.632958	0.653901	0.681313	0.588451	0.614634	0.645084	0.660333	0.674118
11	Oryol region	0.0129241	0.0125717	0.0121632	0.0125572	0.0392034	0.0426609	0.0411821	0.0441558	0.0991814	0.0997553	0.0674704	0.0696042	0.0141526	0.0152042	0.0149721	0.0148427	0.00885702	0.0120742	0.0106908	0.0106299	0.0369943	0.0379259	0.0368647	0.0381244	0.428187	0.426829	0.455635	0.456057	0.470588
12	Ryazan region	0.0424573	0.0412998	0.0420711	0.0421982	0.0771568	0.0854811	0.0819126	0.0907728	0.18165	0.1439	0.0914705	0.106533	0.0614037	0.0520728	0.0489598	0.0551577	0.0404892	0.0357913	0.0419408	0.030315	0.0876372	0.0900449	0.0889201	0.0925655	0.493027	0.509756	0.533573	0.546318	0.568235
13	Smolensk region	0.0500198	0.0474926	0.0447645	0.0522287	0.0645404	0.0693564	0.0710253	0.0729052	0.854999	0.7259	0.512085	0.630467	0.28343	0.248711	0.259941	0.318184	0.0261493	0.0245796	0.0217928	0.0228346	0.0859431	0.0852564	0.0843285	0.0902282	0.426964	0.441463	0.460432	0.45962	0.477647
14	Tambov region	0.0127524	0.0126063	0.0133208	0.0138465	0.0569422	0.0588844	0.0593535	0.0608499	0.0665675	0.0601841	0.0369913	0.0442162	0.0124503	0.01166	0.011013	0.0122528	0.0265711	0.0241483	0.0300164	0.0271654	0.0484895	0.0482088	0.0494593	0.0495427	0.42941	0.443902	0.465228	0.470309	0.488235
15	Tver region	0.0470942	0.0479076	0.045244	0.045262	0.120377	0.129029	0.105139	0.109738	1	1	0.691236	0.774196	0.46305	0.495629	0.443114	0.463013	0.0312105	0.0120742	0.0275493	0.038189	0.120049	0.123329	0.106495	0.106922	0.484463	0.491463	0.507194	0.507126	0.502353
16	Tula region	0.084974	0.0876996	0.0904378	0.0974214	0.0902411	0.0912373	0.0914408	0.0961967	0.111651	0.106801	0.0744653	0.0831851	0.0573915	0.0575801	0.0614919	0.0668832	0.0506116	0.047003	0.0439967	0.0468504	0.133265	0.134155	0.137184	0.143747	0.473452	0.487805	0.504796	0.516627	0.537647
17	Yaroslavl region	0.0497691	0.0490088	0.0479326	0.0504334	0.11695	0.121941	0.112653	0.116051	0.145082	0.166492	0.113812	0.141662	0.0672253	0.0801642	0.0778477	0.0913578	0.032054	0.0314791	0.0378289	0.0330709	0.12013	0.119811	0.113631	0.115297	0.403719	0.418293	0.434053	0.438242	0.451765
18	Moscow	0.121943	0.144455	0.134103	0.138217	1	1	1	1	0.187665	0.191922	0.132574	0.151256	0.552081	0.58461	0.602114	0.623353	0.0253058	0.0263044	0.0308388	0.023622	0.762691	0.757967	0.754506	0.736797	0.658184	0.656098	0.655875	0.649644	0.665882
19	Republic of Karelia	0.0688159	0.0680248	0.0672808	0.0747053	0.071277	0.0738984	0.0712076	0.0685576	0.14487	0.135408	0.0914494	0.11823	0.0596451	0.0577018	0.0572968	0.0707693	0.048081	0.0534713	0.0501645	0.0507874	0.10674	0.106036	0.104086	0.107015	0.385368	0.397561	0.41247	0.418052	0.432941
20	Republic of Komi	0.0883712	0.0892541	0.0891812	0.0888732	0.0690549	0.0707071	0.0705318	0.0703114	0.241344	0.246265	0.165618	0.191574	0.113865	0.121272	0.122382	0.128981	0.190215	0.210436	0.161184	0.137795	0.122317	0.122537	0.122758	0.120369	0.521165	0.540244	0.559952	0.56057	0.576471
23	Nenets Autonomous Okrug (NAO)	0.0327724	0.0317312	0.0320784	0.0294075	0.00332276	0.00323254	0.00321463	0.00316781	0.178266	0.173628	0.424796	0.561962	0.0211308	0.0207379	0.0767914	0.0862116	0.0421763	0.0314791	0.0275493	0.0232283	0.030731	0.0297204	0.0300312	0.0274274	0.565207	0.591463	0.621103	0.629454	0.637647
24	Arkhangelsk region without NAO	0.062865	0.0631405	0.0613781	0.0675872	0.0759473	0.0783024	0.0807319	0.0844757	0.18402	0.181114	0.0338832	0.0342908	0.0742599	0.0761034	0.0214174	0.0212269	0.0636862	0.0564899	0.0563322	0.0515748	0.104621	0.104559	0.105009	0.110672	0.539516	0.559756	0.581535	0.583135	0.6
25	Vologda region	0.136557	0.139637	0.140317	0.149415	0.125646	0.120482	0.113956	0.1234	0.143226	0.149811	0.103907	0.117684	0.111287	0.119169	0.121996	0.135317	0.180936	0.162139	0.169819	0.148425	0.201444	0.197939	0.195048	0.20557	0.495473	0.518293	0.540767	0.554632	0.572941
26	Kaliningrad region	0.014894	0.0153645	0.0163431	0.0168412	0.071256	0.0727279	0.0709766	0.0757664	0.348282	0.355708	0.230322	0.240933	0.0802697	0.0848599	0.0824998	0.0826654	0.0109658	0.0103493	0.00945724	0.00826772	0.0597517	0.0593633	0.0595056	0.0613413	0.463665	0.478049	0.494005	0.498812	0.512941
27	Leningrad region	0.136065	0.147734	0.152782	0.159754	0.226286	0.233135	0.234614	0.247976	0.416746	0.441184	0.297534	0.317732	0.429323	0.489695	0.506573	0.517871	0.0953184	0.094006	0.0797697	0.084252	0.267081	0.276195	0.282844	0.291398	0.452655	0.473171	0.496403	0.507126	0.527059
28	Murmansk region	0.137542	0.136733	0.13755	0.143761	0.0799967	0.0768034	0.0777288	0.0789746	0.296008	0.294598	0.189085	0.220083	0.196764	0.198664	0.192968	0.213282	0.102488	0.0927124	0.0949836	0.0783465	0.172335	0.167803	0.169539	0.173258	0.320529	0.323171	0.326739	0.327791	0.331765
29	Novgorod region	0.0249046	0.0268362	0.0283186	0.031654	0.0585828	0.0556592	0.0544972	0.0581542	0.0991772	0.0905389	0.0542631	0.0738696	0.0230112	0.0213154	0.0194171	0.0261559	0.0223534	0.0241483	0.0250822	0.0248031	0.060153	0.0585826	0.0594457	0.063304	0.485686	0.5	0.516787	0.516627	0.531765
30	Pskov region	0.00780307	0.00705258	0.0068549	0.00719902	0.033381	0.03527	0.0347888	0.0366484	0.0836772	0.0189745	0.0156036	0.0152803	0.0092667	0.00216874	0.00264479	0.00246581	0.0147617	0.0159552	0.0164474	0.0145669	0.028711	0.0284411	0.0281583	0.0288505	0.48691	0.502439	0.517986	0.522565	0.541176
31	Saint Petersburg	0.0777541	0.084035	0.0815866	0.0811256	0.475407	0.486172	0.451815	0.457412	0.165876	0.174764	0.121034	0.132001	0.243015	0.267267	0.261708	0.260281	0.0366934	0.0362225	0.0275493	0.026378	0.379821	0.380544	0.359213	0.352528	0.504037	0.526829	0.552758	0.564133	0.567059
32	Republic of Adygea	0.00432028	0.00407911	0.004102	0.00444431	0.0236963	0.0249601	0.0243621	0.0311182	0.0249013	0.0242356	0.016193	0.0372457	0.0018556	0.00188287	0.00186269	0.00480239	0.00421763	0.00344976	0.00246711	0.00314961	0.0193193	0.0193319	0.0191097	0.0230519	0.523611	0.541463	0.56235	0.571259	0.590588
33	Republic of Kalmykia	0.00046547	0.00044143	0.000675092	0.000536644	0.00972961	0.0107586	0.0110528	0.0158273	0.0212126	0.0463273	0.0305343	0.0511491	0.000555777	0.00133752	0.00140338	0.00292718	0.00126529	0.00172488	0.00246711	0.0011811	0.0067926	0.00718413	0.00763535	0.0102315	0.510154	0.534146	0.559952	0.573634	0.596471
34	Republic of Crimea	0.013651	0.0142434	0.0152861	0.0171804	0.10212	0.109521	0.110354	0.119838	0.0692	0.077421	0.0850723	0.0994949	0.0210677	0.0254003	0.0428557	0.0494351	0.0122311	0.00991807	0.0127467	0.0145669	0.0789296	0.0816376	0.0836878	0.0888302	0.249572	0.296341	0.328537	0.361045	0.389412
35	Krasnodarskiy Territory	0.0781787	0.0778217	0.0838017	0.0892909	0.372857	0.398326	0.40293	0.443467	0.111403	0.11129	0.062284	0.0712613	0.134442	0.142944	0.123715	0.139904	0.180093	0.355757	0.177632	0.163386	0.312872	0.319608	0.32998	0.350996	0.523611	0.521951	0.56235	0.571259	0.590588
36	Astrakhan region	0.0246139	0.0245137	0.0251344	0.0256035	0.0558915	0.0568636	0.0569213	0.0617403	0.21413	0.210208	0.142077	0.167036	0.0480144	0.0484207	0.0497858	0.0563156	0.0434416	0.0142303	0.0427632	0.0440945	0.058133	0.0573179	0.0582135	0.0602761	0.530952	0.552439	0.57554	0.574822	0.589412
37	Volgograd region	0.113115	0.124236	0.118921	0.134417	0.122106	0.158097	0.176583	0.183371	0.300644	0.246188	0.150115	0.186498	0.207225	0.206063	0.195462	0.239493	0.0582033	0.062527	0.0592105	0.0688976	0.178698	0.208277	0.216311	0.229585	0.472229	0.490244	0.505995	0.513064	0.530588
38	Rostov region	0.099822	0.105793	0.105633	0.110565	0.252436	0.268926	0.259227	0.275002	0.42931	0.461279	0.332738	0.374541	0.41841	0.486113	0.515564	0.55614	0.0822438	0.0245796	0.0649671	0.0688976	0.252674	0.26223	0.257408	0.265467	0.440421	0.439024	0.466427	0.470309	0.483529
39	Sevastopol	0.00153073	0.00223624	0.00220183	0.00233223	0.0258289	0.0413507	0.0466859	0.0479179	0.0613971	0.0841706	0.175372	0.196037	0.00433122	0.0094993	0.0334474	0.0346377	0.00210881	0.00129366	0.00123355	0.00275591	0.0182891	0.0280828	0.0316843	0.0315891	0.296061	0.358537	0.378897	0.404988	0.424706
40	Republic of Dagestan	0.00452625	0.00379302	0.00424975	0.00460641	0.125144	0.129674	0.130559	0.146921	0.143828	0.16033	0.091027	0.0919285	0.047763	0.0549338	0.0476386	0.0486687	0.00590468	0.00603708	0.00534539	0.00393701	0.0860952	0.0852577	0.086942	0.0946512	0.286274	0.293902	0.302158	0.306413	0.317647
41	Republic of Ingushetia	0.000525825	0.00157361	0.00094117	0.00112896	0.0143616	0.014019	0.01558	0.0172092	0	0	0	0	0	0	0	0	0.000421763	0.00043122	0.00328947	0.000787402	0.0098859	0.0102321	0.0107537	0.0115972	0.397602	0.409756	0.423261	0.422803	0.438824
42	Kabardino-Balkarian Republic	0.00438866	0.00393279	0.00397424	0.00434265	0.0275094	0.0287158	0.028607	0.0317231	0.0695612	0.0637095	0.0371305	0.0533147	0.00587117	0.00552461	0.00485109	0.00695932	0.00126529	0.00129366	0.00123355	0.0011811	0.021882	0.0215778	0.0217045	0.0233371	0.424517	0.436585	0.44964	0.448931	0.465882
43	Karachay-Cherkess Republic	0.00799487	0.00749494	0.00753999	0.00745771	0.0170558	0.0192386	0.0181934	0.0191904	0.196464	0.200194	0.126904	0.135411	0.0137625	0.0150411	0.0138846	0.0138618	0.00716997	0.00646831	0.00616776	0.00629921	0.0181612	0.0186956	0.0181759	0.0183017	0.452655	0.465854	0.480815	0.480998	0.498824
44	Republic of North Ossetia - Alania	0.00945489	0.00819601	0.00345309	0.00339482	0.0173727	0.0197072	0.0266436	0.0292227	0.044314	0.0473631	0.0284388	0.0840338	0.00335721	0.00373129	0.00342341	0.00985807	0.00168705	0.00474342	0.00287829	0.00393701	0.0196412	0.0196033	0.0199982	0.0209732	0.461218	0.469512	0.482014	0.482185	0.5
45	Chechen Republic	0.00395264	0.0038194	0.00416639	0.00437602	0.0498207	0.0530085	0.0553455	0.0596451	0.000784266	0.000682581	0.0348067	0.0748827	0.000109352	0.000101032	0.00815418	0.0170035	0.00632644	0.00603708	0.00657895	0.00629921	0.0361486	0.036831	0.0389187	0.040596	0.300954	0.309756	0.314149	0.31829	0.330588
46	Stavropol Territory	0.0584308	0.0573808	0.0531313	0.0553514	0.136418	0.144909	0.143659	0.154143	0.427448	0.367765	0.194893	0.203773	0.231574	0.20932	0.161817	0.16306	0.0400675	0.0409659	0.0419408	0.0433071	0.140455	0.141628	0.137933	0.143063	0.508931	0.528049	0.545564	0.532067	0.571765
47	Republic of Bashkortostan	0.230625	0.229798	0.227675	0.218992	0.266754	0.268333	0.268957	0.2653	0.185463	0.189221	0.138305	0.161547	0.268993	0.281374	0.30809	0.31933	0.176297	0.196205	0.193668	0.173622	0.376022	0.370019	0.370068	0.3534	0.335209	0.35	0.366906	0.376485	0.391765
48	Republic of Mari El	0.0100741	0.010292	0.0103386	0.010906	0.043369	0.0430426	0.043056	0.0505537	0.0747267	0.0756719	0.0486198	0.0528365	0.0107356	0.0110021	0.0106729	0.0120111	0.0147617	0.0163864	0.0152138	0.0216535	0.0372462	0.0361786	0.0364677	0.0406421	0.413506	0.42561	0.446043	0.445368	0.457647
49	Republic of Mordovia	0.019572	0.0200791	0.0197323	0.0201654	0.0447945	0.0459473	0.0463186	0.0458316	0.0942124	0.104218	0.0696732	0.0754787	0.0168819	0.0194969	0.0196034	0.0193142	0.0227752	0.0163864	0.0209704	0.0232283	0.046456	0.0465511	0.0467419	0.0457487	0.397602	0.412195	0.426859	0.432304	0.445882
50	Republic of Tatarstan	0.27264	0.284358	0.286773	0.281908	0.242847	0.261657	0.254348	0.259627	0.16325	0.191612	0.136315	0.13728	0.249942	0.318326	0.338314	0.310519	0.120624	0.169901	0.119243	0.127953	0.396931	0.413389	0.412305	0.404397	0.419623	0.434146	0.44964	0.448931	0.462353
51	Udmurt Republic	0.0732852	0.0718294	0.0705312	0.0689186	0.102632	0.108162	0.0943822	0.0952432	0.0770161	0.0849715	0.0597804	0.0701095	0.0389799	0.0447365	0.0437917	0.0464575	0.0586251	0.0771884	0.0810033	0.0515748	0.131217	0.131008	0.121695	0.118469	0.420847	0.435366	0.44964	0.453682	0.467059
52	Chuvash Republic	0.025774	0.0253808	0.0260244	0.0260704	0.0702217	0.0728476	0.0712675	0.0731847	0.223427	0.191057	0.116738	0.154421	0.0590769	0.052346	0.0478792	0.0585113	0.0181358	0.0181113	0.0152138	0.00984252	0.0685508	0.0681757	0.068136	0.0677424	0.364571	0.379268	0.395683	0.39905	0.409412
53	Perm Territory	0.213176	0.217464	0.214814	0.214999	0.263495	0.264398	0.253657	0.250884	0.255409	0.261592	0.172117	0.182835	0.353359	0.375066	0.361681	0.348775	0.131168	0.126348	0.120477	0.11063	0.358683	0.356773	0.349095	0.341045	0.442868	0.459756	0.478417	0.490499	0.5
54	Kirov region	0.0438266	0.0439933	0.0442605	0.0458673	0.0926844	0.0972457	0.094176	0.0990383	0.13185	0.125461	0.0850728	0.0956174	0.0503604	0.0503334	0.050517	0.0539338	0.0413328	0.0405347	0.0365954	0.034252	0.0990233	0.0998292	0.0986481	0.100844	0.42941	0.445122	0.461631	0.469121	0.482353
55	Nizhny Novgorod region	0.133647	0.131974	0.133224	0.137763	0.291498	0.297918	0.293607	0.278552	0.0985716	0.0950852	0.0624471	0.0882336	0.117022	0.115932	0.114045	0.143723	0.0636862	0.0396723	0.0666118	0.0480315	0.307784	0.303388	0.303393	0.291217	0.406166	0.404878	0.436451	0.440618	0.451765
56	Orenburg region	0.154991	0.15747	0.139714	0.157496	0.119624	0.131667	0.151788	0.173464	0.162156	0.151895	0.0949942	0.107828	0.133568	0.134638	0.125022	0.146837	0.200337	0.21906	0.185855	0.159449	0.213549	0.220562	0.218641	0.243463	0.327869	0.342683	0.358513	0.365796	0.375294
57	Penza region	0.0176001	0.0166528	0.0176153	0.0183647	0.0748736	0.0797941	0.0763754	0.0793978	0.0572855	0.0579217	0.0369446	0.0438878	0.0142484	0.0151192	0.0142455	0.0159321	0.0156052	0.0116429	0.0115132	0.0129921	0.0644839	0.0649526	0.0640573	0.0649018	0.382921	0.39878	0.41247	0.416865	0.427059
58	Samara region	0.180001	0.18036	0.17891	0.178518	0.282051	0.314391	0.291493	0.313262	0.189847	0.194939	0.124698	0.158047	0.250411	0.278896	0.256635	0.307581	0.105863	0.094006	0.104441	0.100394	0.341964	0.356003	0.341898	0.347937	0.448985	0.468293	0.486811	0.495249	0.508235
59	Saratov region	0.0830201	0.0832917	0.0817428	0.085509	0.17693	0.177227	0.160105	0.163605	0.658488	0.651319	0.437475	0.541081	0.478697	0.483325	0.456561	0.529705	0.0518768	0.050884	0.0493421	0.05	0.18847	0.184652	0.173375	0.175024	0.390262	0.403659	0.417266	0.421615	0.432941
60	Ulyanovsk region	0.0288034	0.0280106	0.0271619	0.0299509	0.0786372	0.0807425	0.0794624	0.0785662	0.0997074	0.105041	0.0695104	0.0738188	0.0295035	0.0318538	0.0311104	0.0307296	0.0143399	0.0133678	0.0115132	0.0122047	0.0767143	0.0754587	0.0743527	0.0744245	0.4184	0.432927	0.448441	0.447743	0.458824
61	Kurgan region	0.0144744	0.0140525	0.0144462	0.015018	0.0702231	0.0735213	0.0668567	0.0667018	0.16322	0.15694	0.111487	0.109331	0.0369608	0.0370351	0.0370606	0.0331256	0.0185576	0.0168176	0.0185033	0.0153543	0.058708	0.0587203	0.0552244	0.0541685	0.467335	0.391463	0.398082	0.394299	0.390588
62	Sverdlovsk region	0.385236	0.382482	0.368441	0.386142	0.474216	0.493895	0.515795	0.56008	0.247216	0.243147	0.167043	0.193195	0.616859	0.630988	0.653807	0.73491	0.391396	0.369556	0.369243	0.308661	0.646903	0.645745	0.650223	0.680086	0.43308	0.452439	0.47482	0.484561	0.503529
65	Khanty-Mansi Autonomous Okrug (KMAO)	1	1	1	1	0.196276	0.202144	0.200315	0.216836	0.259257	0.248834	0.0244545	0.0286905	1	1	0.147203	0.160477	0.595529	0.59379	0.522204	0.449606	1	1	1	1	0.315635	0.326829	0.338129	0.340855	0.349412
66	Yamalo-Nenets Autonomous Okrug (YNAO)	0.146741	0.150353	0.153261	0.162658	0.0511402	0.0522026	0.0508825	0.0614012	0.1512	0.165453	1	1	0.0941326	0.109136	1	1	0.331506	0.319966	0.313734	0.345669	0.161405	0.164136	0.166127	0.178783	0.315635	0.297561	0.338129	0.340855	0.349412
67	Tyumen region without KMAO and YNAO	0.0634361	0.0691672	0.0823992	0.109177	0.137134	0.138943	0.142556	0.165666	0.224115	0.234916	0.135449	0.133489	0.125592	0.139852	0.132703	0.146939	0.0582033	0.0819319	0.0764803	0.0641732	0.145285	0.148138	0.16276	0.196797	0.315635	0.326829	0.338129	0.340855	0.349412
68	Chelyabinsk region	0.3678	0.373617	0.379258	0.394724	0.250923	0.282474	0.270151	0.294123	0.171996	0.173121	0.115303	0.117523	0.321845	0.350927	0.34915	0.344059	0.2248	0.210436	0.202714	0.179921	0.485131	0.504402	0.503054	0.523404	0.35723	0.369512	0.382494	0.385986	0.395294
69	Republic of Altai	0.000647559	0.00061367	0.000654256	0.000740502	0.0105588	0.0118197	0.0116956	0.0145602	0.010294	0.0191647	0.0156117	0.0363876	0.000297617	0.000616524	0.000754331	0.00195921	0.00295234	0.00172488	0.00246711	0.00275591	0.00749556	0.00800494	0.00802697	0.00962616	0.56643	0.586585	0.606715	0.62114	0.630588
70	Republic of Tyva	0.0022769	0.00266452	0.00270465	0.00235326	0.0138041	0.0136514	0.0135412	0.0153706	0.0285777	0.0287475	0.0207201	0.0211538	0.00121752	0.00126519	0.00137099	0.00136343	0.00843526	0.00172488	0.00205592	0.0019685	0.0110454	0.0109513	0.0109921	0.0115232	0.385368	0.402439	0.422062	0.432304	0.449412
71	Republic of Khakassia	0.217346	0.215558	0.215184	0.227883	0.0701295	0.0539255	0.0424469	0.0531984	0.320894	0.383168	0.247696	0.301965	0.29134	0.342001	0.320215	0.388839	0.0485027	0.0461406	0.0431743	0.0433071	0.235379	0.2221	0.214765	0.230219	0.234891	0.242683	0.252998	0.25772	0.267059
72	Altai Territory	0.0468289	0.0449045	0.044528	0.0452854	0.156973	0.164828	0.158874	0.169868	0.149622	0.137592	0.08534	0.0905567	0.0830136	0.0792561	0.0719842	0.0729624	0.0860396	0.0827943	0.0694901	0.0688976	0.143842	0.143334	0.140128	0.144047	0.452655	0.464634	0.478417	0.485748	0.504706
73	Krasnoyarsk Territory	0.579504	0.575231	0.600763	0.638991	0.314736	0.335907	0.309921	0.342999	0.276402	0.267615	0.180477	0.200309	0.758498	0.767921	0.783957	0.857272	1	1	1	1	0.711448	0.714028	0.721626	0.765147	0.276486	0.27561	0.302158	0.306413	0.318824
74	Irkutsk region	0.529876	0.449617	0.481327	0.476626	0.403142	0.556934	0.522906	0.580263	0.196448	0.200351	0.150356	0.183475	0.550303	0.599155	0.681717	0.791149	0.278364	0.276412	0.264803	0.257874	0.726249	0.744143	0.753226	0.770917	0.118669	0.123171	0.129257	0.131829	0.137647
75	Kemerovo region	0.343314	0.345329	0.340895	0.358621	0.276153	0.276705	0.271403	0.270591	0.150324	0.136166	0.0907136	0.099487	0.278528	0.260519	0.256854	0.265775	0.627583	0.596809	0.723684	0.634646	0.480362	0.476081	0.470388	0.477611	0.371911	0.384146	0.399281	0.407363	0.422353
76	Novosibirsk region	0.0608508	0.0622777	0.0589684	0.0605781	0.250292	0.266158	0.264002	0.278708	0.187558	0.168342	0.116451	0.128204	0.157217	0.150543	0.154036	0.160956	0.0822438	0.0543338	0.0559211	0.0645669	0.217317	0.222525	0.219747	0.224456	0.296061	0.303659	0.311751	0.31829	0.329412
77	Omsk region	0.067977	0.0671933	0.0643814	0.0685337	0.131485	0.141879	0.137579	0.138294	0.142722	0.130154	0.0836081	0.0947523	0.0801164	0.0775546	0.0724065	0.0766896	0.0814003	0.0871065	0.0620888	0.057874	0.145533	0.148272	0.14387	0.144701	0.435527	0.44878	0.470024	0.482185	0.501176
78	Tomsk region	0.0691405	0.0653324	0.0712585	0.0671912	0.0815444	0.0972916	0.0871606	0.0919185	0.0969945	0.0947904	0.0590648	0.0698372	0.0425614	0.0451303	0.0418561	0.0448912	0.110924	0.10263	0.0925164	0.069685	0.113763	0.118471	0.117726	0.114921	0.379251	0.396341	0.410072	0.415677	0.430588
79	Republic of Buryatia	0.0220008	0.0223178	0.0214196	0.0211129	0.0994581	0.0937569	0.0814584	0.0849303	0.217118	0.213728	0.143315	0.158058	0.0707291	0.0676122	0.0609192	0.0625008	0.0476592	0.0401035	0.0283717	0.0370079	0.0844563	0.0787179	0.0706163	0.0706963	0.501346	0.47939	0.479376	0.47981	0.495294
80	Republic of Sakha (Yakutia)	0.0612781	0.0643236	0.0664932	0.0698662	0.0854465	0.101129	0.112333	0.115593	0.246305	0.231543	0.149885	0.177125	0.104006	0.111677	0.116944	0.130625	0.10291	0.110392	0.118421	0.112598	0.109475	0.120017	0.129617	0.131847	0.669195	0.692683	0.718225	0.735154	0.764706
81	Zabaikal Territory	0.0298038	0.0297855	0.03385	0.0361696	0.122888	0.127282	0.125545	0.134823	0.196053	0.194352	0.13075	0.14792	0.0806383	0.0831183	0.0862332	0.0947554	0.0565162	0.0448469	0.0456414	0.053937	0.106635	0.106418	0.109566	0.114526	0.337656	0.336585	0.364508	0.365796	0.378824
82	Kamchatka Territory	0.00718952	0.00644989	0.00659282	0.0071847	0.0276041	0.0304666	0.0310605	0.0345458	0.217031	0.213702	0.144289	0.16528	0.0204127	0.0213671	0.0221938	0.0254607	0.016027	0.01768	0.015625	0.0153543	0.0243841	0.0248798	0.0255528	0.0275407	1	0.815366	0.801679	0.807601	0.786588
83	Primorsky Territory	0.0463136	0.0462404	0.0520069	0.0527532	0.208965	0.219885	0.208275	0.229953	0.175838	0.174345	0.122471	0.133637	0.120403	0.125622	0.131331	0.140222	0.0784479	0.0780509	0.0731908	0.0669291	0.177523	0.179293	0.178147	0.187593	0.412283	0.431707	0.448441	0.451306	0.467059
84	Khabarovsk Territory	0.0432269	0.0493521	0.0509225	0.0520944	0.121061	0.12944	0.126573	0.129702	0.226249	0.21851	0.13831	0.165133	0.102217	0.109635	0.104164	0.115604	0.049768	0.0362225	0.0460526	0.0476378	0.117129	0.124849	0.125113	0.12516	0.502814	0.520732	0.540767	0.526128	0.556471
85	Amur region	0.0281483	0.0277668	0.0243442	0.0273425	0.132646	0.146179	0.149303	0.159213	0.374259	0.339068	0.250258	0.310914	0.161102	0.158882	0.175378	0.212044	0.0560945	0.0487279	0.0509868	0.0535433	0.111598	0.1166	0.11642	0.12193	0.415953	0.429268	0.443645	0.432304	0.46
86	Magadan region	0.0203554	0.0245896	0.026674	0.0286163	0.0190211	0.0198903	0.0209015	0.023104	0.234576	0.230028	0.155839	0.178962	0.0273424	0.0314473	0.0343267	0.0390834	0.0139182	0.0125054	0.0246711	0.015748	0.0302193	0.0340183	0.0365929	0.0390443	0.84781	0.878049	0.904077	0.904988	0.877647
87	Sakhalin region	0.0333425	0.0341605	0.0347088	0.0376726	0.0461505	0.0483888	0.0497174	0.056178	0.217031	0.213702	0.144289	0.16528	0.0496772	0.0518523	0.0538259	0.0622152	0.0442851	0.0366537	0.0234375	0.0251969	0.0593423	0.0603766	0.0619726	0.0672979	0.468559	0.482927	0.497602	0.503563	0.517647
88	Jewish Autonomous region	0.00549069	0.00598922	0.00589498	0.00631993	0.0181572	0.0199058	0.0188834	0.0238322	1.74983e-05	1.60461e-05	2.23738e-05	2.28984e-05	1.12734e-06	1.14809e-06	2.3139e-06	2.58471e-06	0.00970055	0.00819319	0.00657895	0.00669291	0.0167027	0.0178039	0.0171809	0.0201806	0.442868	0.458537	0.468825	0.475059	0.476471
89	Chukotka Autonomous Okrug (CAO)	0.00710767	0.0073434	0.00764786	0.00852127	0.00474099	0.00507599	0.00518552	0.00569752	0.221335	0.217714	0.146793	0.168185	0.00794321	0.00841091	0.00881595	0.0102509	0.00843526	0.00991807	0.00740132	0.00669291	0.00930414	0.00961315	0.0099771	0.0108969	0.966479	1	1	1	1

## Sheet: corr
	X1	X2	X3	X4	X5	X6	X7	X8	X9	X10	X11	X12	X13	X14	X15	X16	X17	X18	X19	X20	X21	X22	X23	X24	X25	X26	X27	X28	X29
X1	1
X2	0.997797	1
X3	0.99857	0.998717	1
X4	0.997041	0.998224	0.998987	1
X5	0.431186	0.445411	0.430414	0.437744	1
X6	0.459573	0.467751	0.455989	0.461974	0.993864	1
X7	0.448272	0.458755	0.444083	0.451609	0.993744	0.996454	1
X8	0.466057	0.474868	0.461119	0.469144	0.988649	0.994901	0.998367	1
X9	0.0854495	0.0856139	0.086341	0.0880794	0.0542486	0.0547454	0.0397071	0.041542	1
X10	0.104269	0.105011	0.106308	0.107806	0.0748008	0.0746717	0.0569149	0.0592519	0.991117	1
X11	0.0211895	0.02144	0.0248415	0.0277074	-0.0075302	-0.00717678	-0.0201622	-0.0170138	0.741564	0.753325	1
X12	0.0165753	0.0151314	0.0187863	0.0216244	-0.0116319	-0.00977764	-0.023856	-0.0209009	0.744048	0.759852	0.983385	1
X13	0.823938	0.827423	0.826666	0.827538	0.599392	0.614785	0.594106	0.605744	0.484412	0.512688	0.30557	0.320589	1
X14	0.819681	0.823065	0.823143	0.82346	0.611433	0.628561	0.606214	0.618157	0.46435	0.50075	0.30265	0.316659	0.996414	1
X15	0.53078	0.529071	0.53378	0.542214	0.567081	0.588435	0.566748	0.579254	0.417352	0.457229	0.628531	0.619938	0.742372	0.760126	1
X16	0.537997	0.533171	0.539027	0.547917	0.560337	0.585719	0.562984	0.577296	0.425789	0.465405	0.611873	0.616918	0.756095	0.772028	0.994657	1
X17	0.81369	0.815184	0.821472	0.832296	0.330115	0.346058	0.331961	0.35091	0.0477939	0.0571986	0.100936	0.0831623	0.665247	0.651634	0.566384	0.565832	1
X18	0.80279	0.804334	0.811293	0.822036	0.340325	0.357088	0.344623	0.365262	0.0266177	0.0349752	0.0754953	0.057777	0.644999	0.632083	0.543281	0.542863	0.988053	1
X19	0.780755	0.782087	0.78884	0.800788	0.324023	0.338859	0.324621	0.341843	0.0393536	0.047268	0.0903795	0.0737852	0.632707	0.618442	0.552322	0.552515	0.993948	0.983037	1
X20	0.76081	0.761763	0.769965	0.782854	0.315189	0.331335	0.31627	0.334239	0.0482289	0.0572508	0.124714	0.106549	0.624141	0.611669	0.580566	0.579461	0.990732	0.980007	0.995458	1
X21	0.885561	0.891423	0.884215	0.886974	0.800964	0.816641	0.809081	0.818259	0.0846311	0.1077	0.0101838	0.00501028	0.855331	0.858706	0.644167	0.645483	0.709896	0.70792	0.684905	0.667122	1
X22	0.886187	0.891811	0.884953	0.887695	0.799296	0.817012	0.809327	0.819044	0.0838754	0.106729	0.0103138	0.00486681	0.854483	0.858691	0.646355	0.647638	0.708949	0.707516	0.683672	0.666562	0.999557	1
X23	0.886505	0.892042	0.885267	0.88851	0.797643	0.815795	0.80984	0.820147	0.0771431	0.099149	0.0057994	-8.25927e-05	0.849649	0.853627	0.64368	0.645161	0.710175	0.710083	0.684999	0.668305	0.998917	0.999528	1
X24	0.888624	0.893903	0.887367	0.892133	0.791225	0.810225	0.805238	0.817509	0.0786911	0.100615	0.00936534	0.0034099	0.849544	0.853234	0.649923	0.65264	0.722282	0.722934	0.697097	0.681512	0.997019	0.997891	0.998987	1
X25	-0.319709	-0.300833	-0.312225	-0.312415	-0.0320522	-0.0643743	-0.0461576	-0.06295	0.0434972	0.0295794	-0.0336216	-0.0319688	-0.229235	-0.233485	-0.246243	-0.262454	-0.279243	-0.265975	-0.268846	-0.274128	-0.228651	-0.22921	-0.22839	-0.23594	1
X26	-0.332371	-0.311857	-0.324586	-0.324658	-0.0321164	-0.0656953	-0.0452647	-0.0627207	0.0376333	0.021713	-0.05102	-0.046924	-0.240192	-0.24497	-0.269966	-0.286114	-0.298481	-0.285404	-0.287441	-0.294878	-0.237086	-0.237079	-0.23602	-0.243807	0.980237	1
X27	-0.334252	-0.313077	-0.325974	-0.325535	-0.0297843	-0.0638882	-0.0425603	-0.0597076	0.0315924	0.0157881	-0.0404335	-0.0372346	-0.244223	-0.24869	-0.261015	-0.278129	-0.289815	-0.275196	-0.278845	-0.285103	-0.237133	-0.236949	-0.235525	-0.242837	0.972299	0.997584	1
X28	-0.334169	-0.312839	-0.325955	-0.325308	-0.0295486	-0.0635989	-0.0415948	-0.0585054	0.017674	0.00237229	-0.048276	-0.0454455	-0.250051	-0.254126	-0.26536	-0.282563	-0.28835	-0.273324	-0.277313	-0.284	-0.236957	-0.236646	-0.235012	-0.242074	0.966939	0.994866	0.998453	1
X29	-0.343782	-0.321893	-0.335433	-0.334615	-0.0271417	-0.0617858	-0.0386524	-0.0558002	0.0108819	-0.00705898	-0.0595158	-0.0567708	-0.257592	-0.262588	-0.273941	-0.291018	-0.29332	-0.277326	-0.281838	-0.288421	-0.242096	-0.241625	-0.23969	-0.24676	0.95576	0.990153	0.995488	0.99741	1

## Sheet: VRS_2017
NO	DMU	Score	Benchmark(Lambda)	Proportionate Movement (X17)	Slack Movement (X17)	Projection (X17)	Proportionate Movement (X1)	Slack Movement (X1)	Projection (X1)	Proportionate Movement (X5)	Slack Movement (X5)	Projection (X5)
1	Belgorod region	0.748079	Kursk region(0,364358); Moscow(0,002689); Khakassia R.(0,632953)	-0.012431	0	0.036915	0	0	0.170082	0	0	0.073321
2	Bryansk region	0.167263	Kursk region(0,049203); Moscow(0,037323); North Ossetia - Alania R.(0,913474)	-0.016507	0	0.003316	0	0	0.017534	0	0	0.056736
3	Vladimir region	0.378126	Kursk region(0,151306); Moscow(0,081136); North Ossetia - Alania R.(0,767558)	-0.009704	0	0.005901	0	0	0.030516	0	0	0.105369
4	Voronezh Region	0.395816	Kursk region(0,571130); Moscow(0,098596); North Ossetia - Alania R.(0,330275)	-0.019367	0	0.012687	0	0	0.065595	0	0	0.145469
5	Ivanovo region	0.262292	Moscow(0,037745); Ingushetia R.(0,027006); North Ossetia - Alania R.(0,935248)	-0.007156	0	0.002544	0	0	0.01346	0	0	0.054381
6	Kaluga Region	0.67991	Kursk region(0,268932); Moscow(0,083500); North Ossetia - Alania R.(0,647567)	-0.003645	0	0.007743	0	0	0.04006	0	0	0.11412
7	Kostroma region	0.161378	Kursk region(0,086247); Moscow(0,028741); North Ossetia - Alania R.(0,885012)	-0.0191	0	0.003675	0	0	0.019491	0	0	0.050328
8	Kursk region	1	Kursk region(1,000000)	0	0	0.016871	0	0	0.088332	0	0	0.072026
9	Lipetsk region	0.189329	Kursk region(0,691345); Moscow(0,025963); Khakassia R.(0,282692)	-0.111463	0	0.026032	0	0	0.125676	0	0	0.095583
10	Moscow region	0.794813	Moscow(0,590768); Khakassia R.(0,229572); Irkutsk region(0,179660)	-0.019645	0	0.076096	0	0	0.217134	0	0	0.679296
11	Oryol region	0.270639	Kursk region(0,013358); Moscow(0,021474); North Ossetia - Alania R.(0,965168)	-0.00646	0	0.002397	0	0	0.012924	0	0	0.039203
12	Ryazan region	0.200548	Kursk region(0,360206); Moscow(0,040807); North Ossetia - Alania R.(0,598988)	-0.032369	0	0.00812	0	0	0.042457	0	0	0.077157
13	Smolensk region	0.364712	Kursk region(0,484231); Moscow(0,021069); North Ossetia - Alania R.(0,494700)	-0.016612	0	0.009537	0	0	0.05002	0	0	0.06454
14	Tambov region	0.092842	Moscow(0,040709); Ingushetia R.(0,143554); North Ossetia - Alania R.(0,815737)	-0.024104	0	0.002467	0	0	0.012752	0	0	0.056942
15	Tver region	0.291553	Kursk region(0,355926); Moscow(0,085029); North Ossetia - Alania R.(0,559045)	-0.022111	0	0.0091	0	0	0.047094	0	0	0.120377
16	Tula region	0.321442	Kursk region(0,925041); Moscow(0,022707); North Ossetia - Alania R.(0,052253)	-0.034343	0	0.016269	0	0	0.084974	0	0	0.090241
17	Yaroslavl region	0.299587	Kursk region(0,398162); Moscow(0,079192); North Ossetia - Alania R.(0,522645)	-0.022451	0	0.009603	0	0	0.049769	0	0	0.11695
18	Moscow	1	Moscow(1,000000)	0	0	0.025306	0	0	0.121943	0	0	1
19	Republic of Karelia	0.273319	Kursk region(0,732436); Moscow(0,014120); North Ossetia - Alania R.(0,253444)	-0.03494	0	0.013141	0	0	0.068816	0	0	0.071277
20	Republic of Komi	0.088742	Kursk region(0,999699); Khakassia R.(0,000301)	-0.173335	0	0.01688	0	0	0.088371	0	0.00297	0.072025
21	Nenets Autonomous Okrug (NAO)	0.146422	Kursk region(0,295616); North Ossetia - Alania R.(0,704384)	-0.036001	0	0.006176	0	0	0.032772	0	0.030206	0.033529
22	Arkhangelsk region without NAO	0.18866	Kursk region(0,643129); Moscow(0,023840); North Ossetia - Alania R.(0,333031)	-0.051671	0	0.012015	0	0	0.062865	0	0	0.075947
23	Vologda region	0.158652	Kursk region(0,582932); Moscow(0,058515); Khakassia R.(0,358553)	-0.15223	0	0.028706	0	0	0.136557	0	0	0.125646
24	Kaliningrad region	0.262712	Moscow(0,055096); Ingushetia R.(0,084957); North Ossetia - Alania R.(0,859947)	-0.008085	0	0.002881	0	0	0.014894	0	0	0.071256
25	Leningrad region	0.300112	Kursk region(0,506602); Moscow(0,166900); Khakassia R.(0,326498)	-0.066712	0	0.028606	0	0	0.136065	0	0	0.226286
26	Murmansk region	0.282352	Kursk region(0,611647); Moscow(0,009364); Khakassia R.(0,378989)	-0.073551	0	0.028938	0	0	0.137542	0	0	0.079997
27	Novgorod region	0.21148	Kursk region(0,147783); Moscow(0,033719); North Ossetia - Alania R.(0,818498)	-0.017626	0	0.004727	0	0	0.024905	0	0	0.058583
28	Pskov region	0.10755	Moscow(0,017535); Ingushetia R.(0,405901); North Ossetia - Alania R.(0,576564)	-0.013174	0	0.001588	0	0	0.007803	0	0	0.033381
29	Saint Petersburg	0.428592	Kursk region(0,218460); Moscow(0,453981); North Ossetia - Alania R.(0,327558)	-0.020967	0	0.015726	0	0	0.077754	0	0	0.475407
30	Republic of Adygea	0.24301	Moscow(0,008527); Ingushetia R.(0,682464); North Ossetia - Alania R.(0,309009)	-0.003193	0	0.001025	0	0	0.00432	0	0	0.023696
31	Republic of Kalmykia	0.333333	Ingushetia R.(1,000000)	-0.000844	0	0.000422	0	6e-05	0.000526	0	0.004632	0.014362
32	Republic of Crimea	0.241923	Moscow(0,088211); Ingushetia R.(0,641341); North Ossetia - Alania R.(0,270448)	-0.009272	0	0.002959	0	0	0.013651	0	0	0.10212
33	Krasnodarskiy Territory	0.086538	Kursk region(0,385963); Moscow(0,340303); North Ossetia - Alania R.(0,273735)	-0.164508	0	0.015585	0	0	0.078179	0	0	0.372857
34	Astrakhan region	0.107407	Kursk region(0,148022); Moscow(0,030967); North Ossetia - Alania R.(0,821011)	-0.038776	0	0.004666	0	0	0.024614	0	0	0.055891
35	Volgograd region	0.394433	Kursk region(0,767734); Moscow(0,054331); Khakassia R.(0,177935)	-0.035246	0	0.022957	0	0	0.113115	0	0	0.122106
36	Rostov region	0.239841	Kursk region(0,767121); Moscow(0,194491); Khakassia R.(0,038388)	-0.062518	0	0.019725	0	0	0.099822	0	0	0.252436
37	Sevastopol	0.337285	Moscow(0,011634); Ingushetia R.(0,988366)	-0.001398	0	0.000711	0	0.000408	0.001938	0	0	0.025829
38	Republic of Dagestan	0.545101	Moscow(0,112397); Ingushetia R.(0,887603)	-0.002686	0	0.003219	0	0.009646	0.014173	0	0	0.125144
39	Republic of Ingushetia	1	Ingushetia R.(1,000000)	0	0	0.000422	0	0	0.000526	0	0	0.014362
40	Kabardino-Balkarian Republic	0.84204	Moscow(0,012539); Ingushetia R.(0,725348); North Ossetia - Alania R.(0,262114)	-0.0002	0	0.001065	0	0	0.004389	0	0	0.027509
41	Karachay-Cherkess Republic	0.206638	Moscow(0,000186); Ingushetia R.(0,165852); North Ossetia - Alania R.(0,833962)	-0.005688	0	0.001482	0	0	0.007995	0	0	0.017056
42	Republic of North Ossetia - Alania	1	North Ossetia - Alania R.(1,000000)	0	0	0.001687	0	0	0.009455	0	0	0.017373
43	Chechen Republic	0.208171	Moscow(0,035976); Ingushetia R.(0,964024)	-0.005009	0	0.001317	0	0.000941	0.004894	0	0	0.049821
44	Stavropol Territory	0.282013	Kursk region(0,486747); Moscow(0,094077); North Ossetia - Alania R.(0,419176)	-0.028768	0	0.0113	0	0	0.058431	0	0	0.136418
45	Republic of Bashkortostan	0.377646	Moscow(0,176899); Khakassia R.(0,726614); Irkutsk region(0,096487)	-0.109719	0	0.066578	0	0	0.230625	0	0	0.266754
46	Republic of Mari El	0.134429	Moscow(0,027297); Ingushetia R.(0,274537); North Ossetia - Alania R.(0,698165)	-0.012777	0	0.001984	0	0	0.010074	0	0	0.043369
47	Republic of Mordovia	0.16153	Kursk region(0,096087); Moscow(0,022562); North Ossetia - Alania R.(0,881350)	-0.019096	0	0.003679	0	0	0.019572	0	0	0.044795
48	Republic of Tatarstan	0.782202	Moscow(0,110322); Khakassia R.(0,679077); Irkutsk region(0,210601)	-0.026272	0	0.094352	0	0	0.27264	0	0	0.242847
49	Udmurt Republic	0.239883	Kursk region(0,744551); Moscow(0,045356); North Ossetia - Alania R.(0,210093)	-0.044562	0	0.014063	0	0	0.073285	0	0	0.102632
50	Chuvash Republic	0.271211	Kursk region(0,141406); Moscow(0,045918); North Ossetia - Alania R.(0,812675)	-0.013217	0	0.004919	0	0	0.025774	0	0	0.070222
51	Perm Territory	0.415059	Moscow(0,191764); Khakassia R.(0,763042); Irkutsk region(0,045193)	-0.076726	0	0.054443	0	0	0.213176	0	0	0.263495
52	Kirov region	0.203598	Kursk region(0,354584); Moscow(0,056921); North Ossetia - Alania R.(0,588494)	-0.032917	0	0.008415	0	0	0.043827	0	0	0.092684
53	Nizhny Novgorod region	0.44008	Kursk region(0,473433); Moscow(0,237099); Khakassia R.(0,289468)	-0.035659	0	0.028027	0	0	0.133647	0	0	0.291498
54	Orenburg region	0.165843	Kursk region(0,444629); Moscow(0,052320); Khakassia R.(0,503051)	-0.167113	0	0.033224	0	0	0.154991	0	0	0.119624
55	Penza region	0.2158	Kursk region(0,021518); Moscow(0,057321); North Ossetia - Alania R.(0,921161)	-0.012238	0	0.003368	0	0	0.0176	0	0	0.074874
56	Samara region	0.372091	Kursk region(0,121119); Moscow(0,227658); Khakassia R.(0,651223)	-0.066472	0	0.039391	0	0	0.180001	0	0	0.282051
57	Saratov region	0.310039	Kursk region(0,761483); Moscow(0,120025); North Ossetia - Alania R.(0,118492)	-0.035793	0	0.016084	0	0	0.08302	0	0	0.17693
58	Ulyanovsk region	0.384625	Kursk region(0,169857); Moscow(0,052900); North Ossetia - Alania R.(0,777243)	-0.008824	0	0.005516	0	0	0.028803	0	0	0.078637
59	Kurgan region	0.151644	Moscow(0,054153); Ingushetia R.(0,120065); North Ossetia - Alania R.(0,825783)	-0.015743	0	0.002814	0	0	0.014474	0	0	0.070223
60	Sverdlovsk region	0.465608	Moscow(0,218311); Khakassia R.(0,177850); Irkutsk region(0,603838)	-0.209159	0	0.182237	0	0	0.385236	0	0	0.474216
61	Khanty-Mansi Autonomous Okrug (KMAO)	1	Khanty-Mansi Autonomous Okrug(1,000000)	0	0	0.595529	0	0	1	0	0	0.196276
62	Yamalo-Nenets Autonomous Okrug (YNAO)	0.09409	Kursk region(0,547271); Khakassia R.(0,452729)	-0.300314	0	0.031191	0	0	0.146741	0	0.020027	0.071167
63	Tyumen region without KMAO and YNAO	0.21059	Kursk region(0,554541); Moscow(0,091035); North Ossetia - Alania R.(0,354424)	-0.045946	0	0.012257	0	0	0.063436	0	0	0.137134
64	Chelyabinsk region	0.712153	Moscow(0,019853); Khakassia R.(0,492680); Irkutsk region(0,487467)	-0.064708	0	0.160092	0	0	0.3678	0	0	0.250923
65	Republic of Altai	0.1487	Ingushetia R.(0,986367); North Ossetia - Alania R.(0,013633)	-0.002513	0	0.000439	0	0	0.000648	0	0.003844	0.014403
66	Republic of Tyva	0.079417	Ingushetia R.(0,803890); North Ossetia - Alania R.(0,196110)	-0.007765	0	0.00067	0	0	0.002277	0	0.001148	0.014952
67	Republic of Khakassia	1	Khakassia R.(1,000000)	0	0	0.048503	0	0	0.217346	0	0	0.070129
68	Altai Territory	0.106095	Kursk region(0,294584); Moscow(0,125684); North Ossetia - Alania R.(0,579732)	-0.076911	0	0.009128	0	0	0.046829	0	0	0.156973
69	Krasnoyarsk Territory	0.309154	Khanty-Mansi Autonomous Okrug(0,199612); Khakassia R.(0,141474); Irkutsk region(0,658914)	-0.690846	0	0.309154	0	0	0.579504	0	0	0.314736
70	Irkutsk region	1	Irkutsk region(1,000000)	0	0	0.278364	0	0	0.529876	0	0	0.403142
71	Kemerovo region	0.23012	Moscow(0,069606); Khakassia R.(0,506088); Irkutsk region(0,424306)	-0.483164	0	0.144419	0	0	0.343314	0	0	0.276153
72	Novosibirsk region	0.146019	Kursk region(0,340563); Moscow(0,218096); North Ossetia - Alania R.(0,441341)	-0.070235	0	0.012009	0	0	0.060851	0	0	0.250292
73	Omsk region	0.161081	Kursk region(0,625975); Moscow(0,081314); North Ossetia - Alania R.(0,292712)	-0.068288	0	0.013112	0	0	0.067977	0	0	0.131485
74	Tomsk region	0.119233	Kursk region(0,720720); Moscow(0,025220); North Ossetia - Alania R.(0,254060)	-0.097698	0	0.013226	0	0	0.06914	0	0	0.081544
75	Republic of Buryatia	0.089416	Kursk region(0,043362); Moscow(0,081125); North Ossetia - Alania R.(0,875513)	-0.043398	0	0.004262	0	0	0.022001	0	0	0.099458
76	Republic of Sakha (Yakutia)	0.114008	Kursk region(0,606303); Moscow(0,035555); North Ossetia - Alania R.(0,358142)	-0.091178	0	0.011733	0	0	0.061278	0	0	0.085446
77	Zabaikal Territory	0.102673	Kursk region(0,113877); Moscow(0,101047); North Ossetia - Alania R.(0,785076)	-0.050714	0	0.005803	0	0	0.029804	0	0	0.122888
78	Kamchatka Territory	0.09081	Moscow(0,011639); Ingushetia R.(0,400335); North Ossetia - Alania R.(0,588027)	-0.014572	0	0.001455	0	0	0.00719	0	0	0.027604
79	Primorsky Territory	0.116547	Kursk region(0,205530); Moscow(0,183548); North Ossetia - Alania R.(0,610922)	-0.069305	0	0.009143	0	0	0.046314	0	0	0.208965
80	Khabarovsk Territory	0.168027	Kursk region(0,301594); Moscow(0,088748); North Ossetia - Alania R.(0,609659)	-0.041406	0	0.008362	0	0	0.043227	0	0	0.121061
81	Amur region	0.098186	Kursk region(0,075698); Moscow(0,113101); North Ossetia - Alania R.(0,811201)	-0.050587	0	0.005508	0	0	0.028148	0	0	0.132646
82	Magadan region	0.27197	Kursk region(0,138195); North Ossetia - Alania R.(0,861805)	-0.010133	0	0.003785	0	0	0.020355	0	0.005904	0.024926
83	Sakhalin region	0.142527	Kursk region(0,283571); Moscow(0,013515); North Ossetia - Alania R.(0,702915)	-0.037973	0	0.006312	0	0	0.033342	0	0	0.04615
84	Jewish Autonomous region	0.117782	Moscow(0,002246); Ingushetia R.(0,472255); North Ossetia - Alania R.(0,525499)	-0.008558	0	0.001143	0	0	0.005491	0	0	0.018157
85	Chukotka Autonomous Okrug (CAO)	0.160569	Ingushetia R.(0,262874); North Ossetia - Alania R.(0,737126)	-0.007081	0	0.001354	0	0	0.007108	0	0.01184	0.016581

## Sheet: VRS_2020
NO	DMU	Score	Benchmark(Lambda)	Proportionate Movement (X20)	Slack Movement (X20)	Projection (X20)	Proportionate Movement (X4)	Slack Movement (X4)	Projection (X4)	Proportionate Movement (X8)	Slack Movement (X8)	Projection (X8)
1	Belgorod region	0.488122	Moscow(0,559911); Khakassia R.(0,440089)	-0.033857	0	0.032285	0	0	0.177678	0	0.465636	0.583323
2	Bryansk region	0.18749	Moscow(0,101965); Kabardino-Balkarian R.(0,898035)	-0.015035	0	0.003469	0	0	0.017993	0	0.07185	0.130454
3	Vladimir region	0.227103	Moscow(0,186424); Kabardino-Balkarian R.(0,813576)	-0.018257	0	0.005365	0	0	0.0293	0	0.097064	0.212234
4	Voronezh Region	0.284994	Moscow(0,527357); Kabardino-Balkarian R.(0,472643)	-0.032654	0	0.013015	0	0	0.074942	0	0.372974	0.54235
5	Ivanovo region	0.269011	Moscow(0,065356); Kabardino-Balkarian R.(0,934644)	-0.007195	0	0.002648	0	0	0.013092	0	0.036819	0.095006
6	Kaluga Region	0.794354	Moscow(0,309705); Kabardino-Balkarian R.(0,690295)	-0.002105	0	0.008131	0	0	0.045804	0	0.22153	0.331603
7	Kostroma region	0.202942	Moscow(0,107586); Kabardino-Balkarian R.(0,892414)	-0.014121	0	0.003595	0	0	0.018746	0	0.083239	0.135896
8	Kursk region	0.741113	Moscow(0,636473); Kabardino-Balkarian R.(0,363527)	-0.005402	0	0.015464	0	0	0.08955	0	0.574942	0.648005
9	Lipetsk region	0.177975	Moscow(0,952770); Kabardino-Balkarian R.(0,047230)	-0.104209	0	0.022562	0	0	0.131894	0	0.853174	0.954268
10	Moscow region	0.815732	Moscow(0,753164); Khanty-Mansi Autonomous Okrug(0,090360); Khakassia R.(0,156475)	-0.014727	0	0.065194	0	0	0.230118	0	0	0.781082
11	Oryol region	0.240649	Moscow(0,061360); Kabardino-Balkarian R.(0,938640)	-0.008072	0	0.002558	0	0	0.012557	0	0.046981	0.091137
12	Ryazan region	0.248284	Moscow(0,282770); Kabardino-Balkarian R.(0,717230)	-0.022788	0	0.007527	0	0	0.042198	0	0.21475	0.305523
13	Smolensk region	0.403251	Moscow(0,357694); Kabardino-Balkarian R.(0,642306)	-0.013627	0	0.009208	0	0	0.052229	0	0.305165	0.37807
14	Tambov region	0.102123	Moscow(0,070991); Kabardino-Balkarian R.(0,929009)	-0.024391	0	0.002774	0	0	0.013847	0	0.039612	0.100462
15	Tver region	0.21054	Moscow(0,305656); Kabardino-Balkarian R.(0,694344)	-0.030149	0	0.00804	0	0	0.045262	0	0.217944	0.327682
16	Tula region	0.358239	Moscow(0,695271); Kabardino-Balkarian R.(0,304729)	-0.030067	0	0.016784	0	0	0.097421	0	0.608741	0.704938
17	Yaroslavl region	0.269336	Moscow(0,344284); Kabardino-Balkarian R.(0,655716)	-0.024164	0	0.008907	0	0	0.050433	0	0.249035	0.365086
18	Moscow	1	Moscow(1,000000)	0	0	0.023622	0	0	0.138217	0	0	1
19	Republic of Karelia	0.255492	Moscow(0,525588); Kabardino-Balkarian R.(0,474412)	-0.037812	0	0.012976	0	0	0.074705	0	0.47208	0.540637
20	Republic of Komi	0.111402	Moscow(0,631418); Kabardino-Balkarian R.(0,368582)	-0.122445	0	0.015351	0	0	0.088873	0	0.572799	0.643111
21	Nenets Autonomous Okrug (NAO)	0.231728	Moscow(0,187227); Kabardino-Balkarian R.(0,812773)	-0.017846	0	0.005383	0	0	0.029407	0	0.209843	0.213011
22	Arkhangelsk region without NAO	0.228457	Moscow(0,472418); Kabardino-Balkarian R.(0,527582)	-0.039792	0	0.011783	0	0	0.067587	0	0.404678	0.489154
23	Vologda region	0.175715	Moscow(0,875109); Khakassia R.(0,124891)	-0.122345	0	0.026081	0	0	0.149415	0	0.758353	0.881753
24	Kaliningrad region	0.396265	Moscow(0,093361); Kabardino-Balkarian R.(0,906639)	-0.004992	0	0.003276	0	0	0.016841	0	0.046356	0.122122
25	Leningrad region	0.336493	Moscow(0,759810); Khakassia R.(0,240190)	-0.055902	0	0.02835	0	0	0.159754	0	0.524612	0.772588
26	Murmansk region	0.317043	Moscow(0,938170); Khakassia R.(0,061830)	-0.053507	0	0.024839	0	0	0.143761	0	0.862484	0.941459
27	Novgorod region	0.232197	Moscow(0,204007); Kabardino-Balkarian R.(0,795993)	-0.019044	0	0.005759	0	0	0.031654	0	0.171104	0.229259
28	Pskov region	0.11395	Moscow(0,021336); Kabardino-Balkarian R.(0,978664)	-0.012907	0	0.00166	0	0	0.007199	0	0.015734	0.052382
29	Saint Petersburg	0.532718	Moscow(0,573546); Kabardino-Balkarian R.(0,426454)	-0.012326	0	0.014052	0	0	0.081126	0	0.129662	0.587074
30	Republic of Adygea	0.380411	Moscow(0,000759); Kabardino-Balkarian R.(0,999241)	-0.001951	0	0.001198	0	0	0.004444	0	0.00134	0.032458
31	Republic of Kalmykia	0.666667	Ingushetia R.(1,000000)	-0.000394	0	0.000787	0	0.000592	0.001129	0	0.001382	0.017209
32	Republic of Crimea	0.22881	Moscow(0,095894); Kabardino-Balkarian R.(0,904106)	-0.011234	0	0.003333	0	0	0.01718	0	0.004738	0.124575
33	Krasnodarskiy Territory	0.094382	Moscow(0,634538); Kabardino-Balkarian R.(0,365462)	-0.147965	0	0.015421	0	0	0.089291	0	0.202664	0.646131
34	Astrakhan region	0.10761	Moscow(0,158812); Kabardino-Balkarian R.(0,841188)	-0.039349	0	0.004745	0	0	0.025604	0	0.123757	0.185497
35	Volgograd region	0.333613	Moscow(0,971619); Kabardino-Balkarian R.(0,028381)	-0.045912	0	0.022985	0	0	0.134417	0	0.789148	0.972519
36	Rostov region	0.27558	Moscow(0,793449); Kabardino-Balkarian R.(0,206551)	-0.049911	0	0.018987	0	0	0.110565	0	0.524999	0.800001
37	Sevastopol	0.544613	Moscow(0,031246); Ingushetia R.(0,968754)	-0.001255	0	0.001501	0	0.00308	0.005412	0	0	0.047918
38	Republic of Dagestan	0.965502	Moscow(0,131983); Ingushetia R.(0,868017)	-0.000136	0	0.003801	0	0.014616	0.019222	0	0	0.146921
39	Republic of Ingushetia	1	Ingushetia R.(1,000000)	0	0	0.000787	0	0	0.001129	0	0	0.017209
40	Kabardino-Balkarian Republic	1	Kabardino-Balkarian R.(1,000000)	0	0	0.001181	0	0	0.004343	0	0	0.031723
41	Karachay-Cherkess Republic	0.270394	Moscow(0,023269); Kabardino-Balkarian R.(0,976731)	-0.004596	0	0.001703	0	0	0.007458	0	0.035063	0.054253
42	Republic of North Ossetia - Alania	0.278017	Moscow(0,004895); Ingushetia R.(0,498867); Kabardino-Balkarian R.(0,496237)	-0.002842	0	0.001095	0	0	0.003395	0	0	0.029223
43	Chechen Republic	0.281524	Moscow(0,043179); Ingushetia R.(0,956821)	-0.004526	0	0.001773	0	0.002672	0.007048	0	0	0.059645
44	Stavropol Territory	0.224711	Moscow(0,381020); Kabardino-Balkarian R.(0,618980)	-0.033576	0	0.009732	0	0	0.055351	0	0.246513	0.400656
45	Republic of Bashkortostan	0.257579	Moscow(0,221562); Khanty-Mansi Autonomous Okrug(0,014216); Khakassia R.(0,764222)	-0.128901	0	0.044721	0	0	0.218992	0	0	0.2653
46	Republic of Mari El	0.105354	Moscow(0,049026); Kabardino-Balkarian R.(0,950974)	-0.019372	0	0.002281	0	0	0.010906	0	0.02864	0.079194
47	Republic of Mordovia	0.165032	Moscow(0,118191); Kabardino-Balkarian R.(0,881809)	-0.019395	0	0.003833	0	0	0.020165	0	0.100333	0.146165
48	Republic of Tatarstan	0.604032	Moscow(0,201882); Khanty-Mansi Autonomous Okrug(0,093415); Khakassia R.(0,704703)	-0.050665	0	0.077288	0	0	0.281908	0	0	0.259627
49	Udmurt Republic	0.232784	Moscow(0,482363); Kabardino-Balkarian R.(0,517637)	-0.039569	0	0.012006	0	0	0.068919	0	0.403541	0.498784
50	Chuvash Republic	0.490043	Moscow(0,162300); Kabardino-Balkarian R.(0,837700)	-0.005019	0	0.004823	0	0	0.02607	0	0.115689	0.188874
51	Perm Territory	0.381756	Moscow(0,207512); Khanty-Mansi Autonomous Okrug(0,007412); Khakassia R.(0,785076)	-0.068396	0	0.042234	0	0	0.214999	0	0	0.250884
52	Kirov region	0.237702	Moscow(0,310177); Kabardino-Balkarian R.(0,689823)	-0.02611	0	0.008142	0	0	0.045867	0	0.233022	0.33206
53	Nizhny Novgorod region	0.49022	Moscow(0,996610); Kabardino-Balkarian R.(0,003390)	-0.024486	0	0.023546	0	0	0.137763	0	0.718166	0.996718
54	Orenburg region	0.174693	Moscow(0,784990); Khakassia R.(0,215010)	-0.131594	0	0.027855	0	0	0.157496	0	0.622964	0.796428
55	Penza region	0.271825	Moscow(0,104741); Kabardino-Balkarian R.(0,895259)	-0.009461	0	0.003532	0	0	0.018365	0	0.053743	0.133141
56	Samara region	0.323423	Moscow(0,550545); Khakassia R.(0,449455)	-0.067924	0	0.03247	0	0	0.178518	0	0.261193	0.574455
57	Saratov region	0.295736	Moscow(0,606289); Kabardino-Balkarian R.(0,393711)	-0.035213	0	0.014787	0	0	0.085509	0	0.455173	0.618778
58	Ulyanovsk region	0.448494	Moscow(0,191286); Kabardino-Balkarian R.(0,808714)	-0.006731	0	0.005474	0	0	0.029951	0	0.138375	0.216941
59	Kurgan region	0.193469	Moscow(0,079742); Kabardino-Balkarian R.(0,920258)	-0.012384	0	0.002971	0	0	0.015018	0	0.042234	0.108935
60	Sverdlovsk region	0.453774	Moscow(0,490100); Khanty-Mansi Autonomous Okrug(0,261883); Khakassia R.(0,248016)	-0.168599	0	0.140062	0	0	0.386142	0	0	0.56008
61	Khanty-Mansi Autonomous Okrug (KMAO)	1	Khanty-Mansi Autonomous Okrug(1,000000)	0	0	0.449606	0	0	1	0	0	0.216836
62	Yamalo-Nenets Autonomous Okrug (YNAO)	0.08386	Moscow(0,727418); Khakassia R.(0,272582)	-0.316681	0	0.028988	0	0	0.162658	0	0.680517	0.741919
63	Tyumen region without KMAO and YNAO	0.292242	Moscow(0,783078); Kabardino-Balkarian R.(0,216922)	-0.045419	0	0.018754	0	0	0.109177	0	0.624293	0.789959
64	Chelyabinsk region	0.76119	Moscow(0,212843); Khanty-Mansi Autonomous Okrug(0,240800); Khakassia R.(0,546356)	-0.042967	0	0.136954	0	0	0.394724	0	0	0.294123
65	Republic of Altai	0.285714	Ingushetia R.(1,000000)	-0.001969	0	0.000787	0	0.000388	0.001129	0	0.002649	0.017209
66	Republic of Tyva	0.476193	Ingushetia R.(0,619036); Kabardino-Balkarian R.(0,380964)	-0.001031	0	0.000937	0	0	0.002353	0	0.007368	0.022738
67	Republic of Khakassia	1	Khakassia R.(1,000000)	0	0	0.043307	0	0	0.227883	0	0	0.053198
68	Altai Territory	0.116756	Moscow(0,305830); Kabardino-Balkarian R.(0,694170)	-0.060853	0	0.008044	0	0	0.045285	0	0.157983	0.327851
69	Krasnoyarsk Territory	0.265408	Moscow(0,209849); Khanty-Mansi Autonomous Okrug(0,556812); Khakassia R.(0,233339)	-0.734592	0	0.265408	0	0	0.638991	0	0	0.342999
70	Irkutsk region	0.727893	Moscow(0,491142); Khanty-Mansi Autonomous Okrug(0,379193); Khakassia R.(0,129665)	-0.070169	0	0.187705	0	0	0.476626	0	0	0.580263
71	Kemerovo region	0.185149	Moscow(0,196401); Khanty-Mansi Autonomous Okrug(0,192132); Khakassia R.(0,611467)	-0.517142	0	0.117504	0	0	0.358621	0	0	0.270591
72	Novosibirsk region	0.16429	Moscow(0,420062); Kabardino-Balkarian R.(0,579938)	-0.053959	0	0.010608	0	0	0.060578	0	0.159751	0.438459
73	Omsk region	0.206332	Moscow(0,479488); Kabardino-Balkarian R.(0,520512)	-0.045933	0	0.011941	0	0	0.068534	0	0.357706	0.496
74	Tomsk region	0.168131	Moscow(0,469460); Kabardino-Balkarian R.(0,530540)	-0.057969	0	0.011716	0	0	0.067191	0	0.394371	0.48629
75	Republic of Buryatia	0.107876	Moscow(0,125269); Kabardino-Balkarian R.(0,874731)	-0.033016	0	0.003992	0	0	0.021113	0	0.068088	0.153018
76	Republic of Sakha (Yakutia)	0.108035	Moscow(0,489441); Kabardino-Balkarian R.(0,510559)	-0.100434	0	0.012165	0	0	0.069866	0	0.390045	0.505638
77	Zabaikal Territory	0.120811	Moscow(0,237738); Kabardino-Balkarian R.(0,762262)	-0.047421	0	0.006516	0	0	0.03617	0	0.127096	0.261919
78	Kamchatka Territory	0.107951	Moscow(0,021229); Kabardino-Balkarian R.(0,978771)	-0.013697	0	0.001658	0	0	0.007185	0	0.017733	0.052279
79	Primorsky Territory	0.138893	Moscow(0,361612); Kabardino-Balkarian R.(0,638388)	-0.057633	0	0.009296	0	0	0.052753	0	0.15191	0.381864
80	Khabarovsk Territory	0.192821	Moscow(0,356691); Kabardino-Balkarian R.(0,643309)	-0.038452	0	0.009186	0	0	0.052094	0	0.247397	0.377099
81	Amur region	0.094064	Moscow(0,171802); Kabardino-Balkarian R.(0,828198)	-0.048507	0	0.005037	0	0	0.027343	0	0.038862	0.198075
82	Magadan region	0.333377	Moscow(0,181317); Kabardino-Balkarian R.(0,818683)	-0.010498	0	0.00525	0	0	0.028616	0	0.184184	0.207288
83	Sakhalin region	0.268609	Moscow(0,248965); Kabardino-Balkarian R.(0,751035)	-0.018429	0	0.006768	0	0	0.037673	0	0.216612	0.27279
84	Jewish Autonomous region	0.225993	Moscow(0,014770); Kabardino-Balkarian R.(0,985230)	-0.00518	0	0.001513	0	0	0.00632	0	0.022192	0.046024
85	Chukotka Autonomous Okrug (CAO)	0.281126	Moscow(0,031213); Kabardino-Balkarian R.(0,968787)	-0.004811	0	0.001882	0	0	0.008521	0	0.056248	0.061946

## Sheet: Data_Russia
№	Year	X32	X33	X34
1	1990	165945	-	989.58
2	1991	167603	-	972.2
3	1992	171872	-	908.1
4	1993	174312	-	850.1
5	1994	176042	-	770
6	1995	176442	-	756.95
7	1996	154373	-	743.2
8	1997	157571	-	730.1
9	1998	159496	239	715.9
10	1999	161401	282	735.9
11	2000	165435	416	762.07
12	2001	175944	538	762.1
13	2002	164352	673	770.8
14	2003	158053	760	792.4
15	2004	178193	838	811.7
16	2005	175021	930	828.12
17	2006	175750	1018	872.4
18	2007	179474	1197	897.7
19	2008	167181	1419	913.5
20	2009	176586	1691	870.3
23	2010	168906	2025	915.65
24	2011	168135	2072	927.2
25	2012	167801	2153	947.6
26	2013	183103	2354	938.4
27	2014	177852	2464	949.6
28	2015	170854	2624	949.33
29	2016	187696	2744	969.2
30	2017	188264	3530	978.4
31	2018	194405	3543	999.4
32	2019	198553	3725	1004
33	2020	217661	3924	975.6

## Sheet: description of the variable
Х1	electricity consumption by industry in 2017 (1000 TWh)
Х2	electricity consumption by industry in 2018 (1000 TWh)
Х3	electricity consumption by industry in 2019 (1000 TWh)
Х4	electricity consumption by industry in 2020 (1000 TWh)
Х5	electricity consumption by the population in 2017 (1000 TWh)
Х6	electricity consumption by the population in 2018 (1000 TWh)
Х7	electricity consumption by the population in 2019 (1000 TWh)
Х8	electricity consumption by the population in 2020 (1000 TWh)
Х9	energy availability in 2017, the ratio of the amount of own production and consumption of electricity (%)
Х10	energy availability in 2018, the ratio of the amount of own production and consumption of electricity (%)
Х11	energy availability in 2019, the ratio of the amount of own production and consumption of electricity (%)
Х12	energy availability in 2020, the ratio of the amount of own production and consumption of electricity (%)
Х13	electricity generation in 2017 (1000 TWh)
Х14	electricity generation in 2018 (1000 TWh)
Х15	electricity generation in 2019 (1000 TWh)
Х16	electricity generation in 2020 (1000 TWh)
Х17	pollution emission in 2017 (k tons)
Х18	pollution emission in 2018 (k tons)
Х19	pollution emission in 2019 (k tons)
Х20	pollution emission in 2020 (k tons)
Х21	total electricity consumption in 2017 (1000 TWh)
Х22	total electricity consumption in 2018 (1000 TWh)
Х23	total electricity consumption in 2019 (1000 TWh)
Х24	total electricity consumption in 2020 (1000 TWh)
Х25	the price of electricity for the population in 2017 (rubles per TWh)
Х26	the price of electricity for the population in 2018 (rubles per TWh)
Х27	the price of electricity for the population in 2019 (rubles per TWh)
Х28	the price of electricity for the population in 2020 (rubles per TWh)
Х29	the price of electricity for the population in 2021 (rubles per TWh)
Х30	belonging to a cluster in 2017 (sequence number from 1 to 5)
Х31	belonging to a cluster in 2020 (sequence number from 1 to 5)
Х32	Renewable energy generation (TWh)
Х33	Average producer prices for electricity (rubles per 1000 TWh)
Х34	Electricity consumption (GWh)
